# Supplementary material for: Ni and Zn N-confused porphyrin complexes as recyclable catalysts for high efficiency solvent-free CO2 fixation into cyclic carbonates
Source: Royal Society of Chemistry journal article supplement (doi:10.1039/d0cy02182b), 2021-01-01
Supplement: d0cy02182b1.pdf [file d0cy02182b1.pdf]

## Supplementary Information

### Ni and Zn N-Confused Porphyrin Complexes as Recyclable Catalysts For High Efficiency Solvent-Free CO<sub>2</sub> Fixation into Cyclic Carbonates

Jay-ar B. dela Cruz<sup>abc</sup> and Chen-Hsiung Hung<sup>c</sup>

<sup>a</sup>*Sustainable Chemical Science and Technology, Taiwan International Graduate Program, Taiwan ROC*

<sup>b</sup>*Department of Applied Chemistry, National Chiao Tung University, Hsinchu, Taiwan 300 ROC*

<sup>c</sup>*Institute of Chemistry, Academia Sinica, 128 Sec 2 Academia Rd., Nankang, Taipei 11529, Taiwan ROC*

#### Table of Contents

|                                                                                                             |     |
|-------------------------------------------------------------------------------------------------------------|-----|
| [1] NMR spectra of R <sup>2</sup> -NCTPP and complexes <b>1</b> , <b>2</b> , and <b>3</b>                   | S2  |
| [2] Mass spectra of R <sup>2</sup> -NCTPP and complexes <b>1</b> , <b>2</b> , and <b>3</b>                  | S6  |
| [3] UV-Vis absorption spectra of R <sup>2</sup> -NCTPP and complexes <b>1</b> , <b>2</b> , and <b>3</b>     | S7  |
| [4] Sample % yield calculation from <sup>1</sup> H NMR data                                                 | S7  |
| [5] NMR spectra of substrates and products                                                                  | S11 |
| [6] Mass spectra of cyclic carbonate products                                                               | S17 |
| [7] HRMS(ESI) spectrum of <b>3</b> after 90 minutes of reaction at Run 3                                    | S19 |
| [8] Global Electrophilicity Indices and Fukui Functions                                                     | S20 |
| [9] Cartesian coordinates of complexes <b>1</b> , <b>2</b> , and <b>3</b> [M06/6-31g(d) level of theory]    | S21 |
| [10] Cartesian coordinates of complexes <b>1</b> , <b>2</b> , and <b>3</b> [B3LYP/6-31g(d) level of theory] | S28 |

[1] NMR spectra of R<sup>2</sup>-NCTPP and complexes **1**, **2**, and **3**.

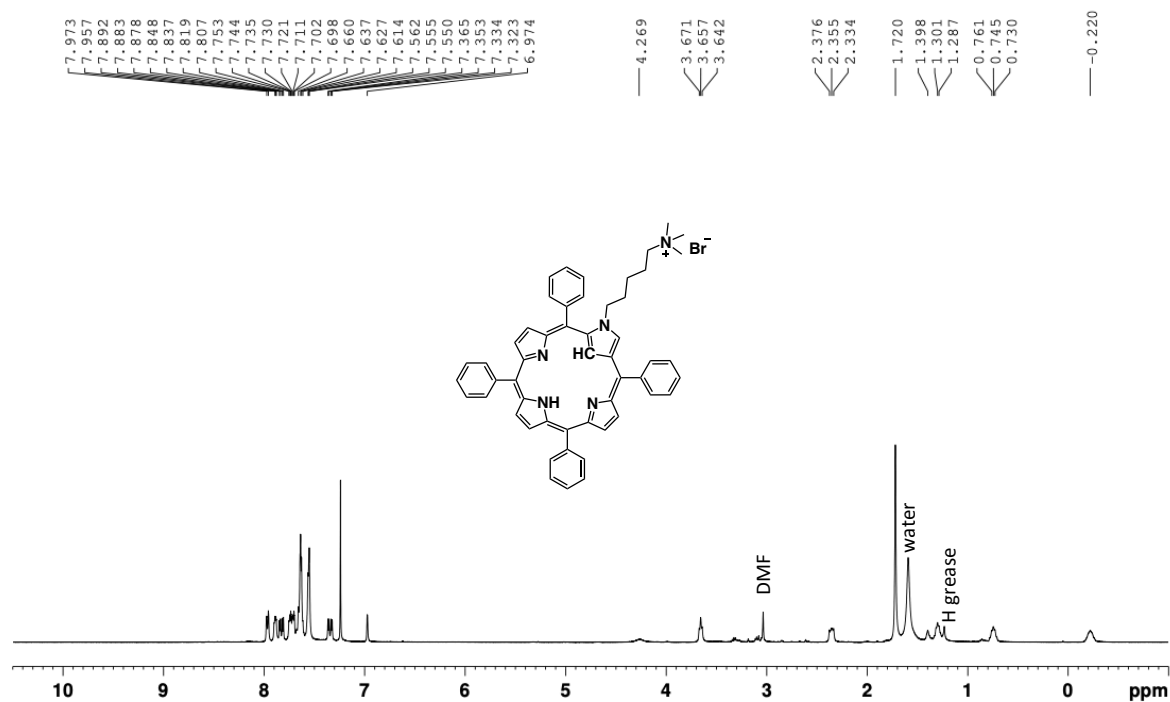

<sup>1</sup>H NMR of R<sup>2</sup>-NCTPP in CDCl<sub>3</sub>.

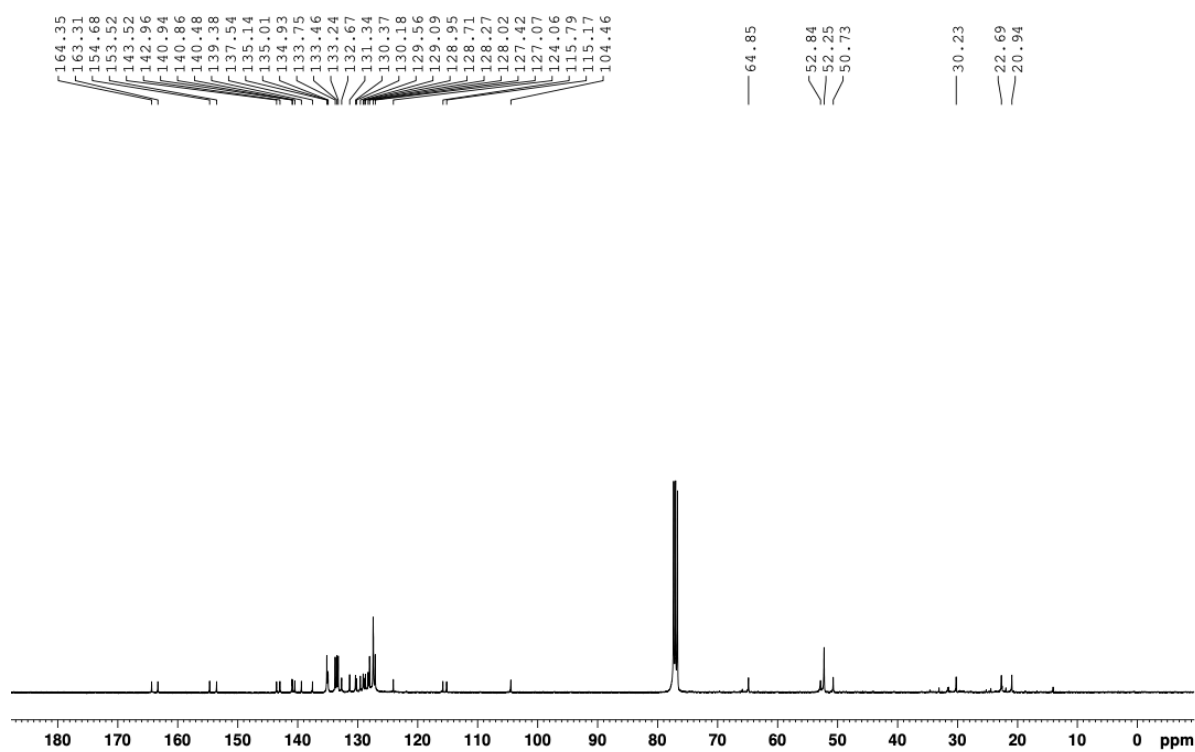

<sup>13</sup>C NMR of R<sup>2</sup>-NCTPP in CDCl<sub>3</sub>.

Complex 1, <sup>1</sup>H NMR 500 MHz, DMSO

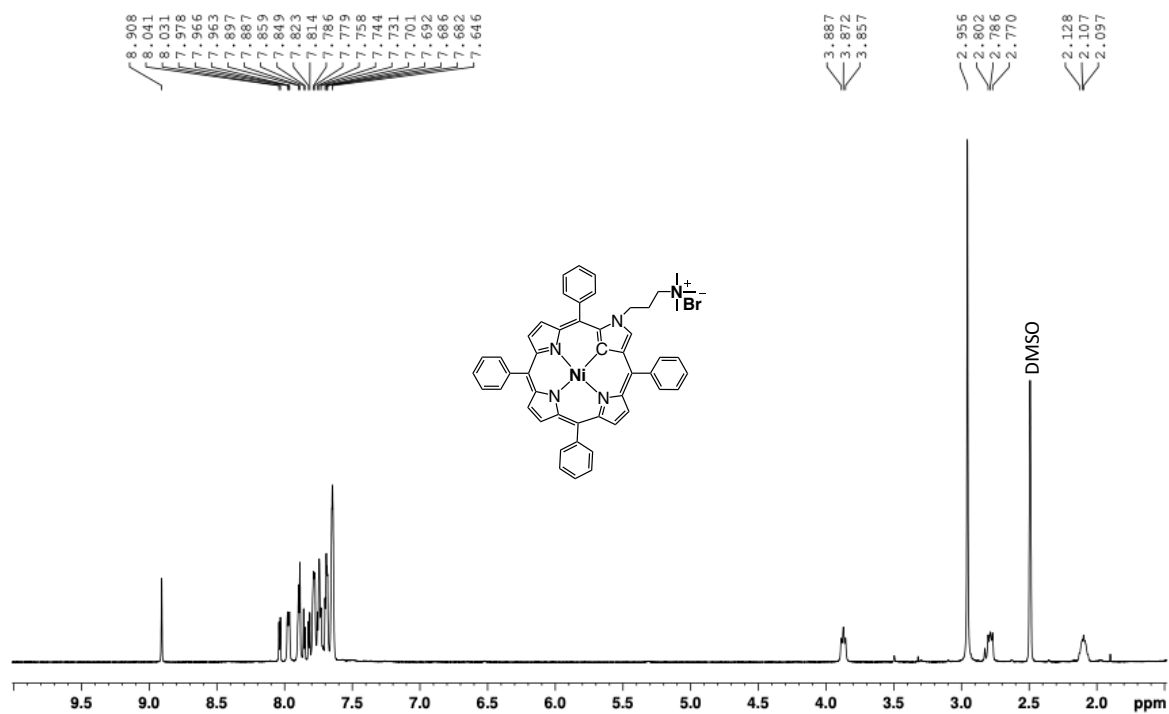

<sup>1</sup>H NMR of **1** in DMSO-d<sub>6</sub>

Complex 1, <sup>13</sup>C NMR 125 MHz DMSO

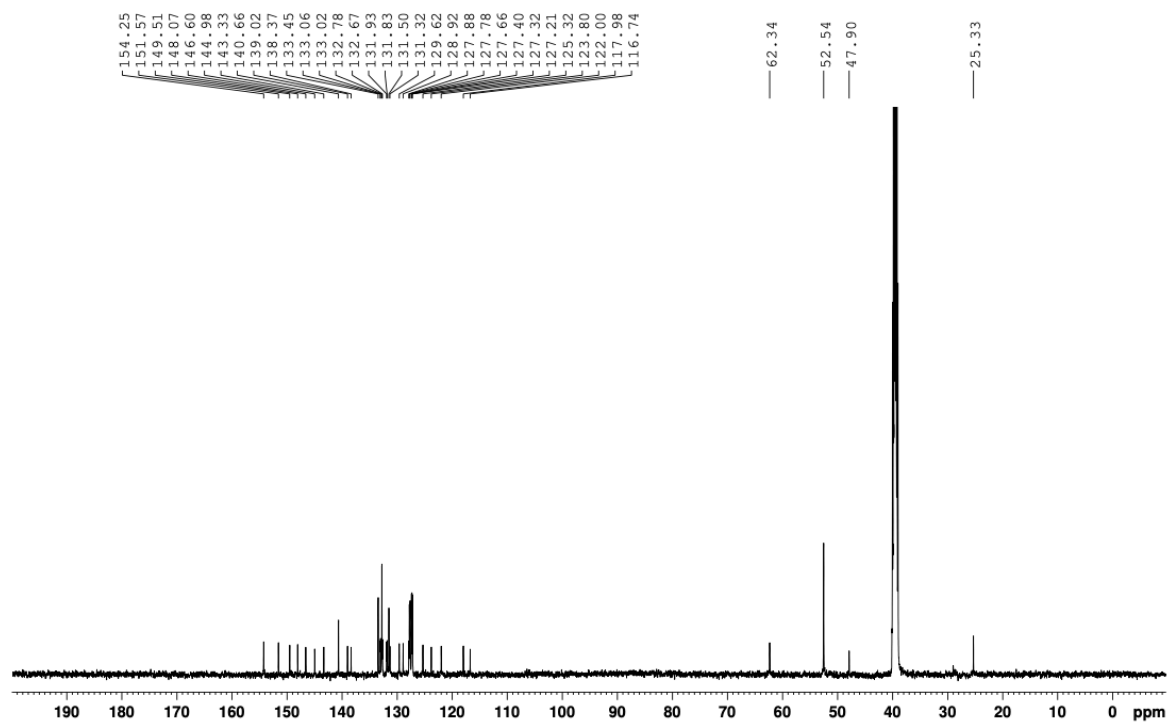

<sup>13</sup>C NMR of **1** in DMSO-d<sub>6</sub>

Complex 2, <sup>1</sup>H NMR 500 MHz, DMSO

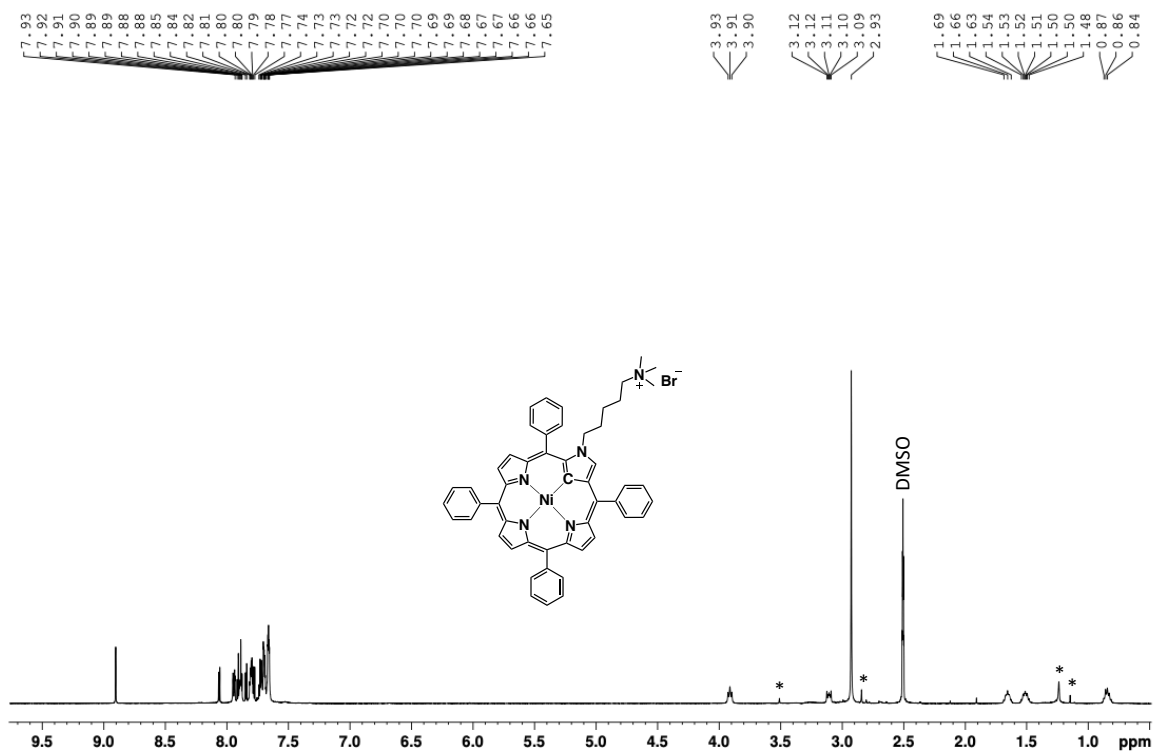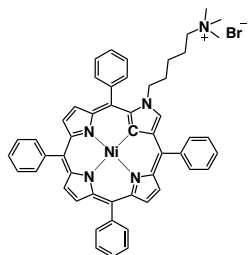

<sup>1</sup>H NMR of **2** in DMSO-d<sub>6</sub>

Complex 2, <sup>13</sup>C NMR 125 MHz, DMSO

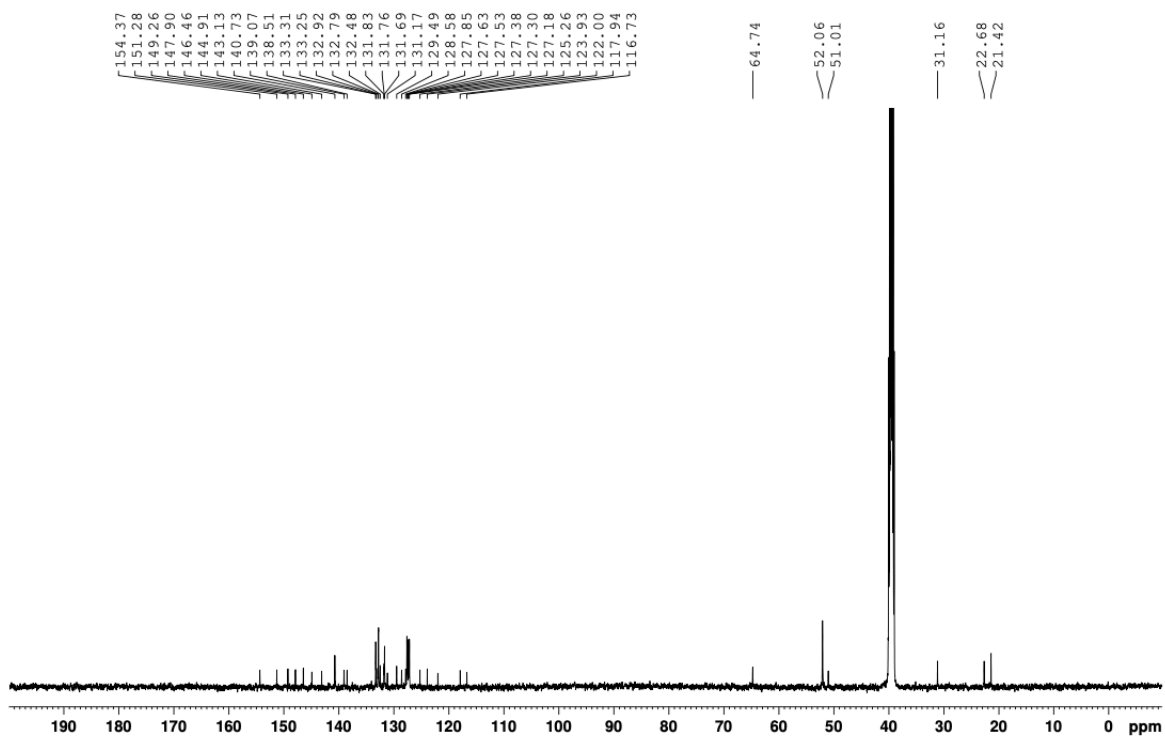

<sup>13</sup>C NMR of **2** in DMSO-d<sub>6</sub>

Complex 3, <sup>1</sup>H NMR 400 MHz, CDCl<sub>3</sub>

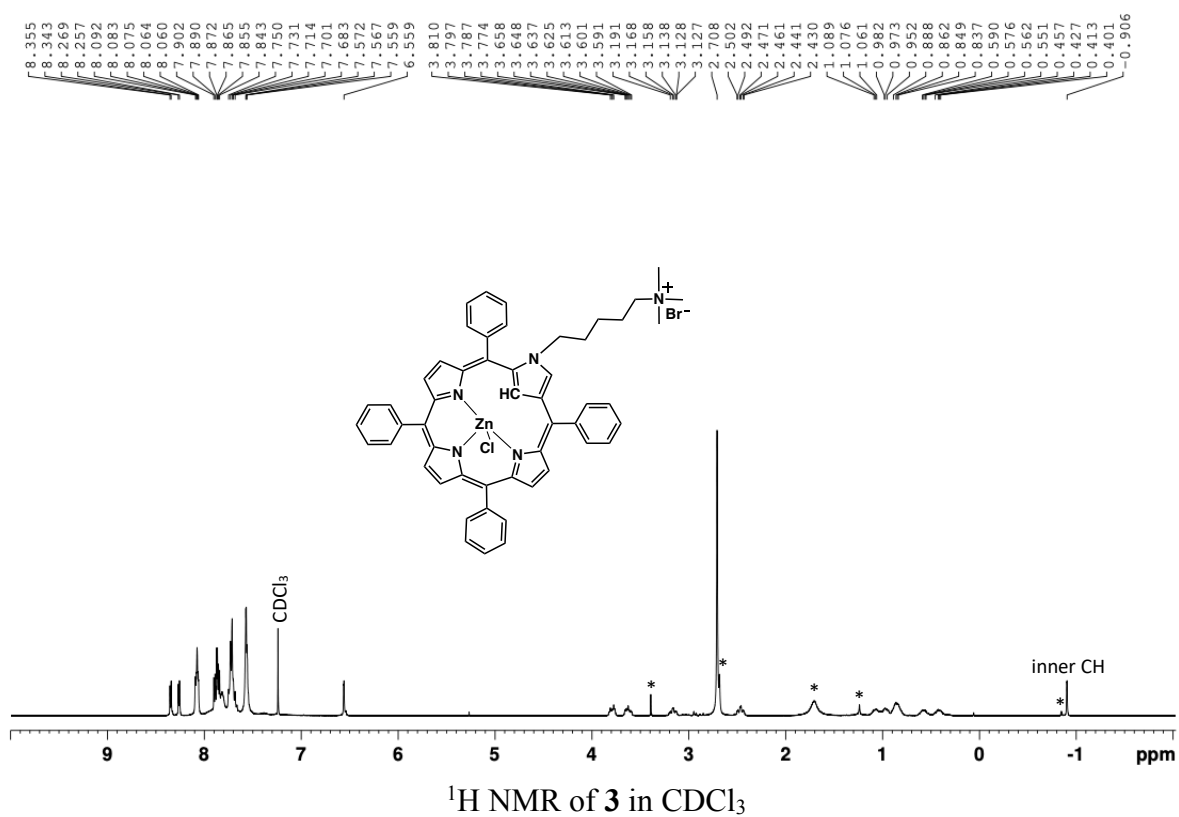

Complex 3, <sup>13</sup>C NMR 100 MHz, CDCl<sub>3</sub>

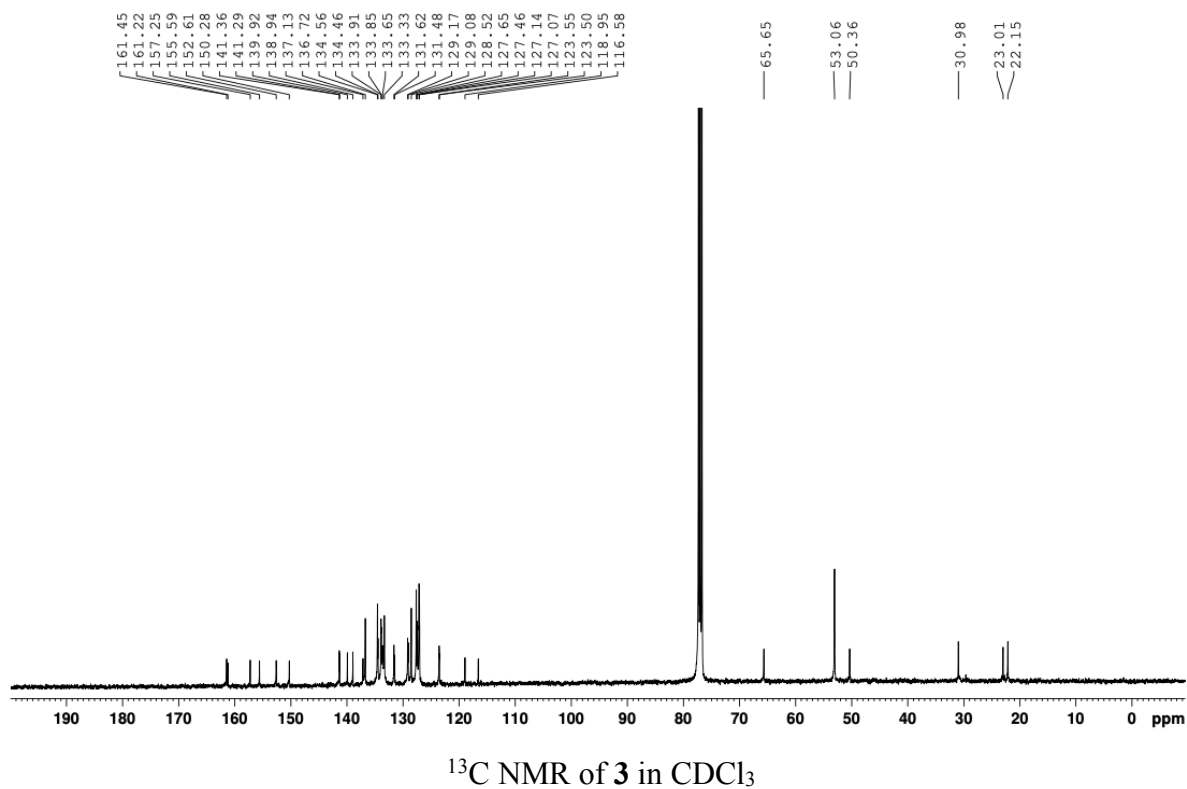

[2] Mass spectra of R<sup>2</sup>-NCTPP and complexes 1, 2, and 3.

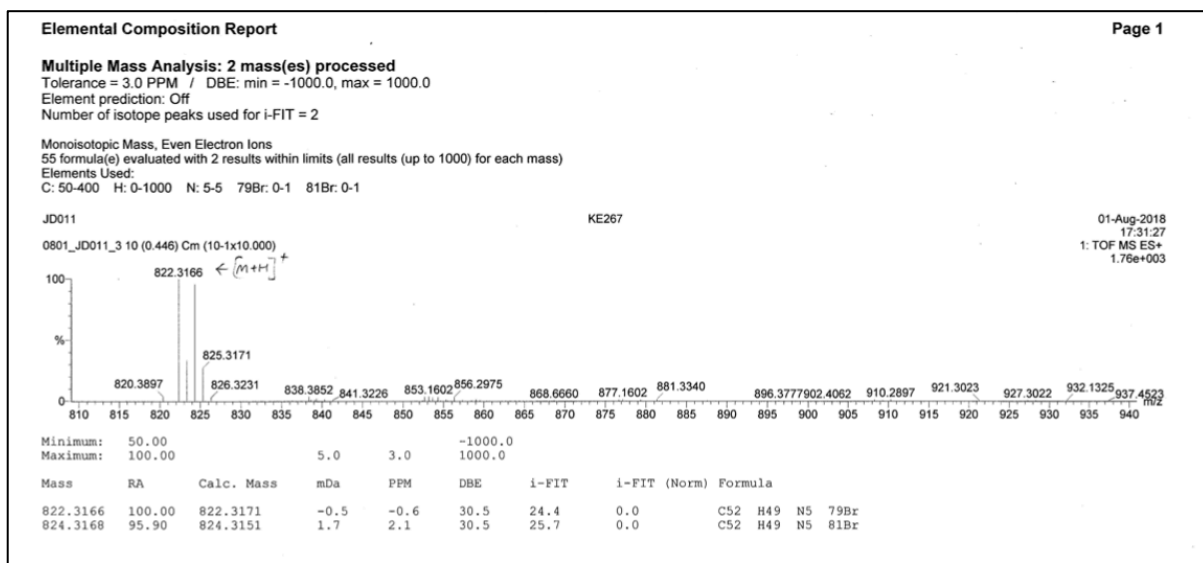

HRMS(ESI) of R<sup>2</sup>-NCTPP

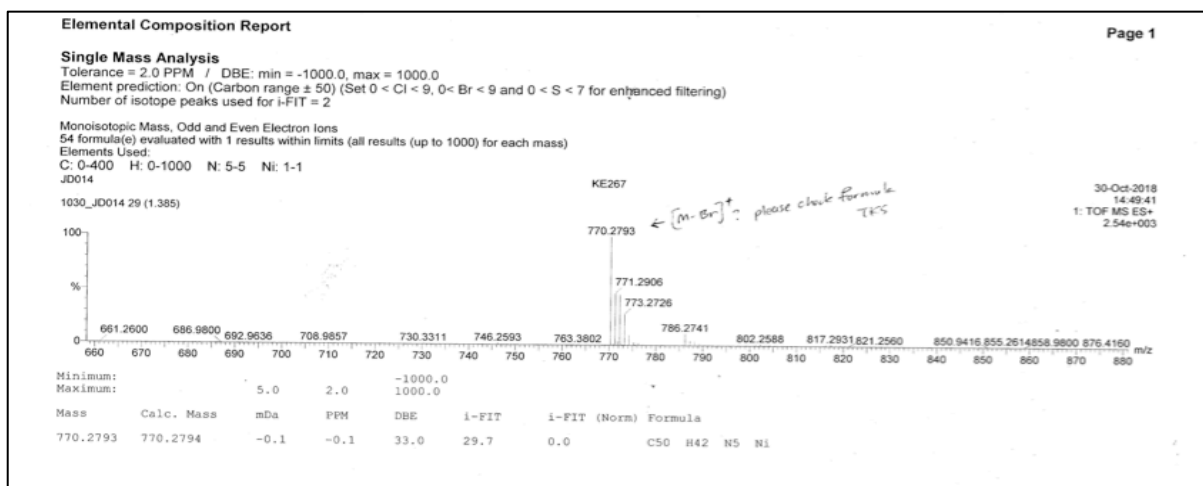

HRMS(ESI) of 1

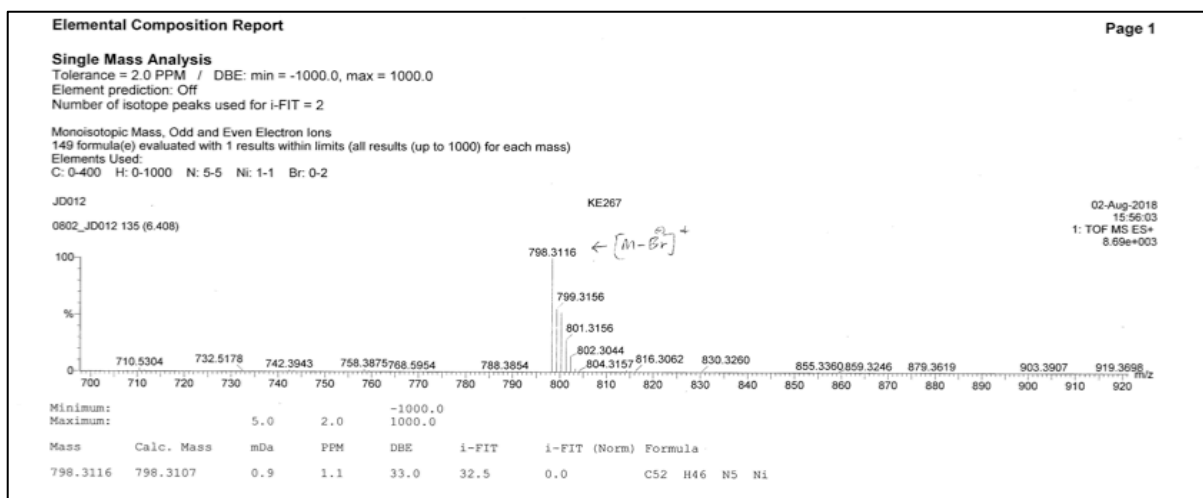

HRMS(ESI) of 2

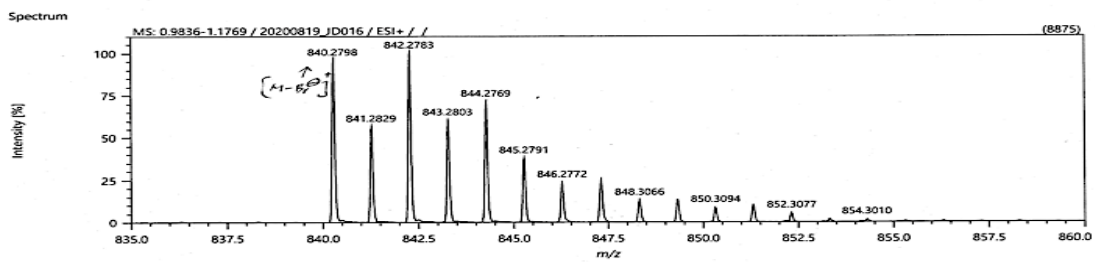

Elemental Composition

| Parameters |               | Elements Set 1: |      |      |   |    |    |
|------------|---------------|-----------------|------|------|---|----|----|
| Tolerance: | ± 10.00 ppm   | Symbol          | C    | H    | N | Zn | Cl |
| Electron:  | Odd/Even      | Min             | 0    | 0    | 5 | 1  | 1  |
| Charge:    | +1            | Max             | 1000 | 4000 | 5 | 1  | 1  |
| DBE:       | -99.0 - 999.0 |                 |      |      |   |    |    |

Results

| Mass      | Formula          | Calculated Mass | Mass Difference [mDa] | Mass Difference [ppm] | DBE  |
|-----------|------------------|-----------------|-----------------------|-----------------------|------|
| 840.27979 | C52 H47 N5 Cl Zn | 840.28060       | -0.81                 | -0.97                 | 31.5 |

HRMS(ESI) of 3

[3] UV-Vis absorption spectra of R<sup>2</sup>-NCTPP, complexes **1**, **2**, and **3** in DCM [ $\epsilon$  (cm<sup>-1</sup>M<sup>-1</sup>)] vs  $\lambda$  (nm).

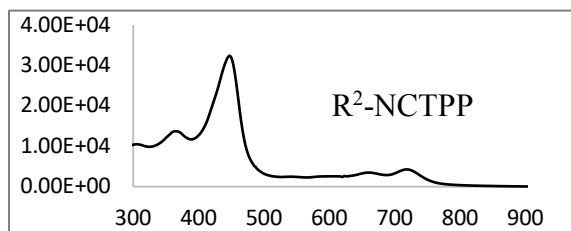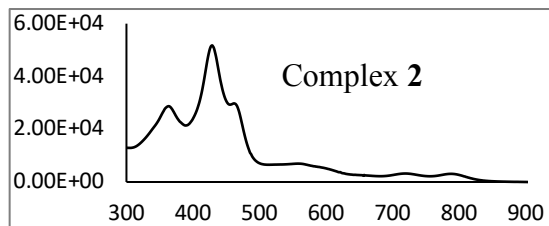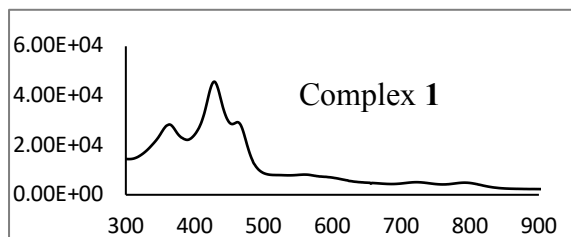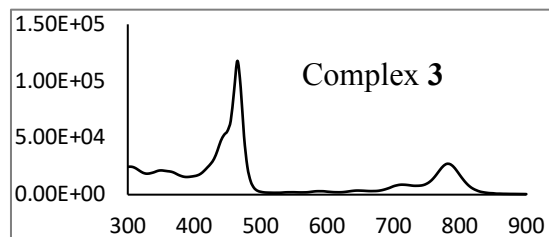



[4] Sample % yield calculation from  $^1\text{H}$  NMR data.

Total crude catalytic product is weighed, from which a portion (e.g., 30 mg) is taken for  $^1\text{H}$  NMR analysis. A known amount of dimethyl sulfone is added to the  $^1\text{H}$  NMR sample as internal standard. The number of moles of catalytic product in the  $^1\text{H}$  NMR sample is directly related to the ratio of the integration of the known catalytic product peak per number of proton in proportion to the standard's integration per proton:

$$\frac{n_{(p,NMR)}}{\left(\frac{I}{H}\right)_p} = \frac{n_{(s,NMR)}}{\left(\frac{I}{H}\right)_s}$$

where  $n_{(p,NMR)}$  = number of moles of the product contained in the NMR tube  
 $n_{(s,NMR)}$  = number of moles of the standard contained in the NMR tube  
 $(I/H)_p$  = integration per number of protons on a selected product  $^1\text{H}$  NMR peak  
 $(I/H)_s$  = integration per number of protons of the internal standard  $^1\text{H}$  NMR peak

The total number of moles of product in the crude reaction mixture is calculated by multiplying  $n_{(p,NMR)}$  by the ratio of the mass of the crude product to the mass of the crude NMR sample:

$$n_p = n_{(p,NMR)} \left( \frac{m_{crude}}{m_{NMR}} \right)$$

where  $n_p$  = total number of moles of the catalytic product  
 $m_{crude}$  = mass of the total crude product  
 $m_{NMR}$  = mass of the NMR sample

Percent yield, is taken as the ratio of  $n_p$  to the theoretical yield (in moles) multiplied by 100.

Sample (actual) data for the conversion of 1,2-epoxy-3-phenoxypropane (molar mass: 150.17, density: 1.109 g/mL, purity: 99.0%) to 4-(phenoxyethyl)-1,3-dioxolan-2-one (molar mass: 194.1) using dimethyl sulfone (molar mass: 94.13, purity: 98.0%) as standard:

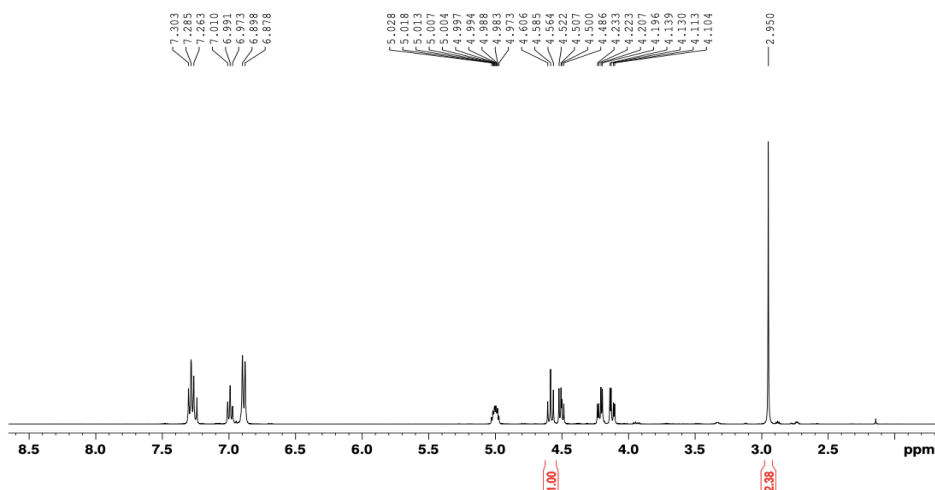

|                                      |                          |
|--------------------------------------|--------------------------|
| initial volume of substrate:         | 0.99 mL                  |
| mass, crude product:                 | 1418.6 mg                |
| mass, NMR sample:                    | 26.69 mg                 |
| mass, standard:                      | 4.97 mg                  |
| Integration for the standard:        | 2.38 ( $\delta$ 2.95, s) |
| Corresponding # of standard protons: | 6                        |
| Integration for the product:         | 1 ( $\delta$ 4.59, t)    |
| Corresponding # of standard protons: | 1                        |

$$\frac{n_{(p,NMR)}}{\left(\frac{I}{H}\right)_p} = \frac{n_{(s,NMR)}}{\left(\frac{I}{H}\right)_s} \Rightarrow \frac{n_{(p,NMR)}}{1} = \frac{0.0517 \text{ mmol}}{\frac{2.38}{6}}$$

$$n_{(p,NMR)} = 0.130 \text{ mmol}$$

$$n_p = n_{(p,NMR)} \times \left(\frac{m_{crude}}{m_{NMR}}\right) = 0.130 \text{ mmol} \times \left(\frac{1418.6 \text{ mg}}{26.69 \text{ mg}}\right) = 6.93 \text{ mmol}$$

$$\begin{aligned} &= 0.99 \text{ mL} \times \left(1109 \frac{\text{mg}}{\text{mL}}\right) \times 0.99 \times \left(\frac{\text{Theoretical yield}}{150.17 \text{ mg}}\right) \times \left(\frac{1 \text{ mmol product}}{1 \text{ mmol substrate}}\right) \\ &= 7.24 \text{ mmol} \end{aligned}$$

$$\% \text{ yield} = \frac{6.93 \text{ mmol}}{7.24 \text{ mmol}} \times 100 = \mathbf{96\%}$$

[5] NMR spectra of substrates and cyclic carbonate products.

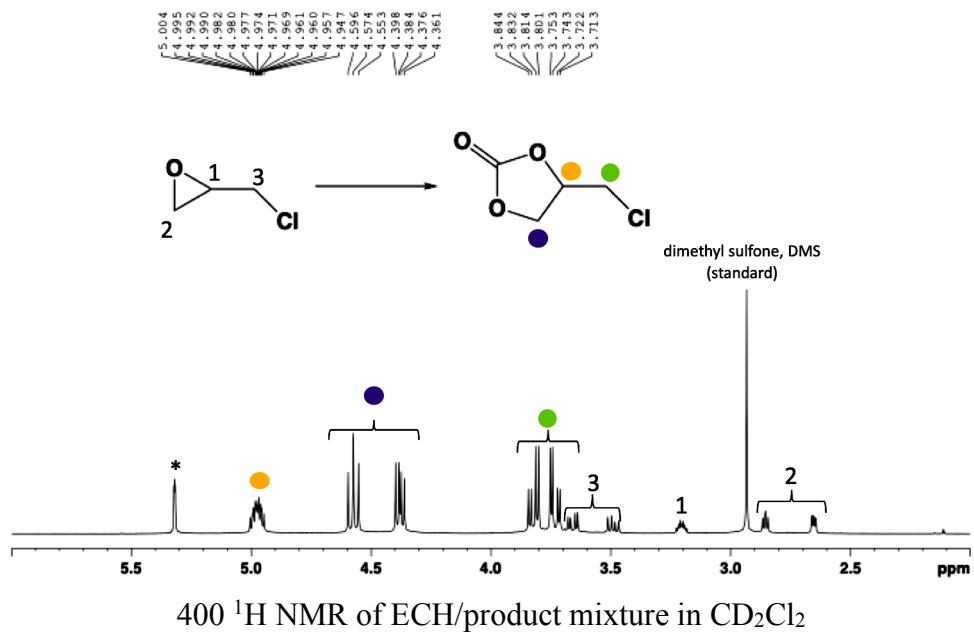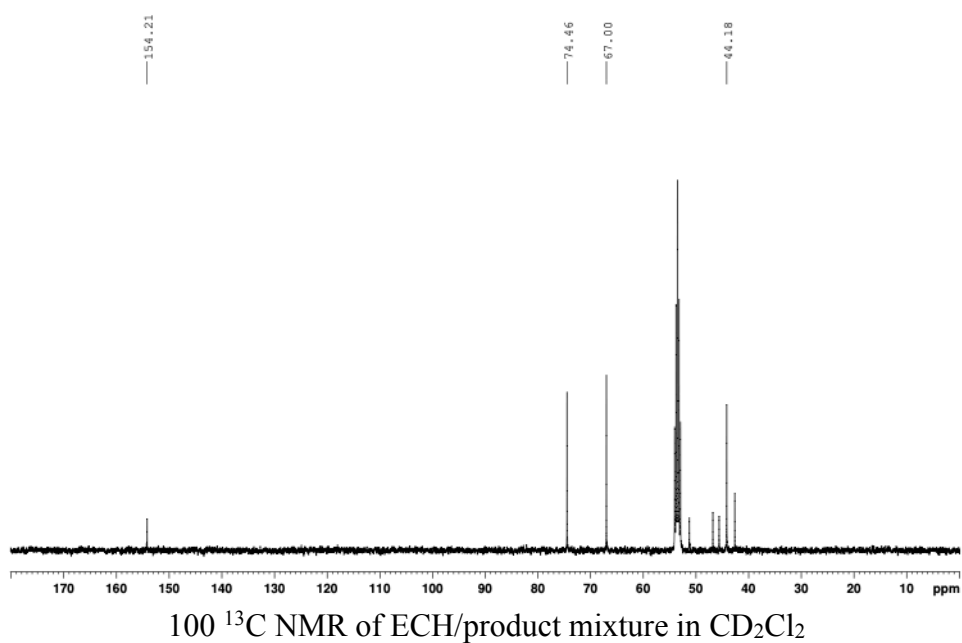

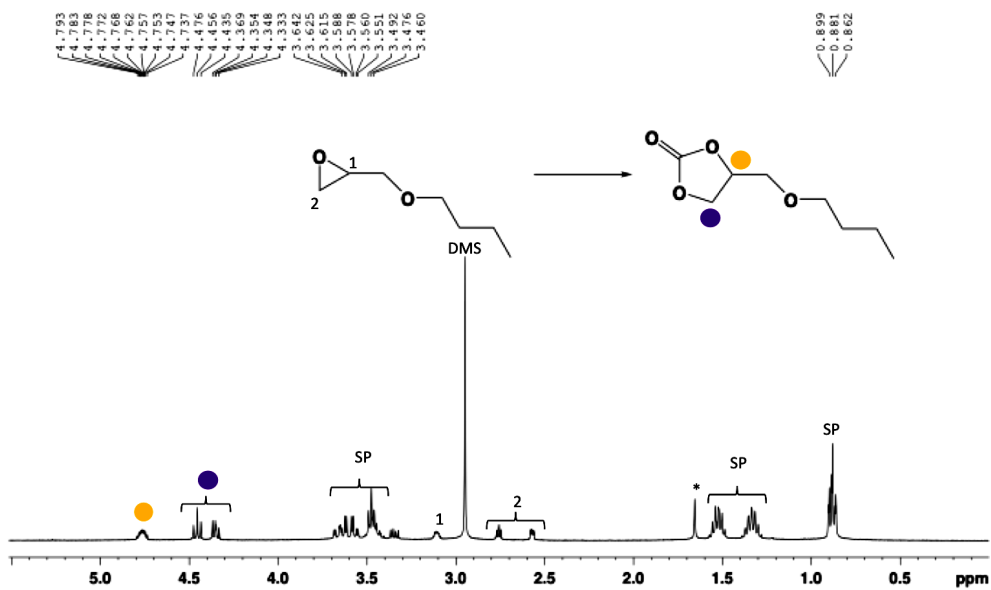

400  $^1\text{H}$  NMR of BGE/product mixture in  $\text{CDCl}_3$   
(SP = overlap of substrate and product chemical shifts)

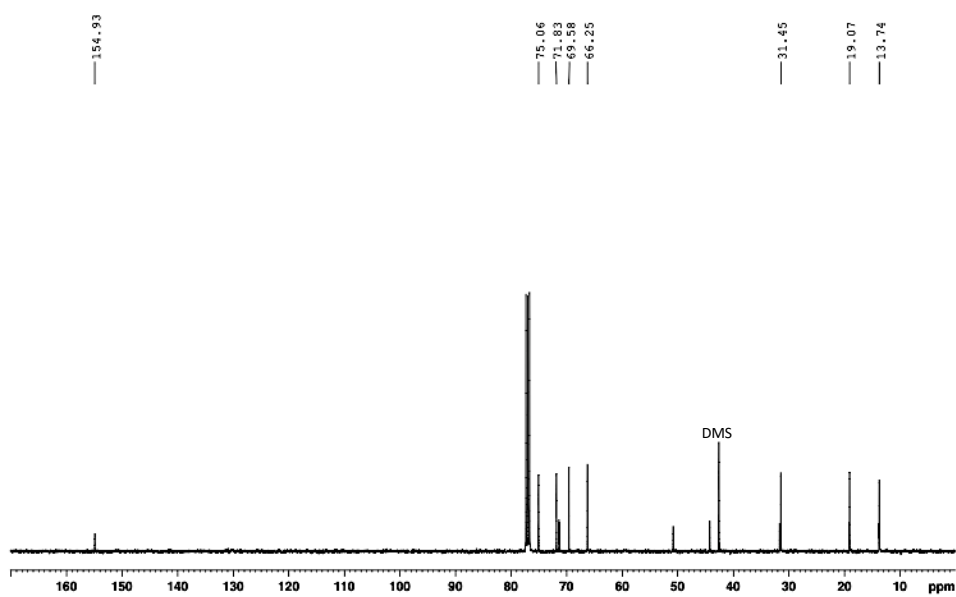

100  $^{13}\text{C}$  NMR of BGE/product mixture in  $\text{CDCl}_3$

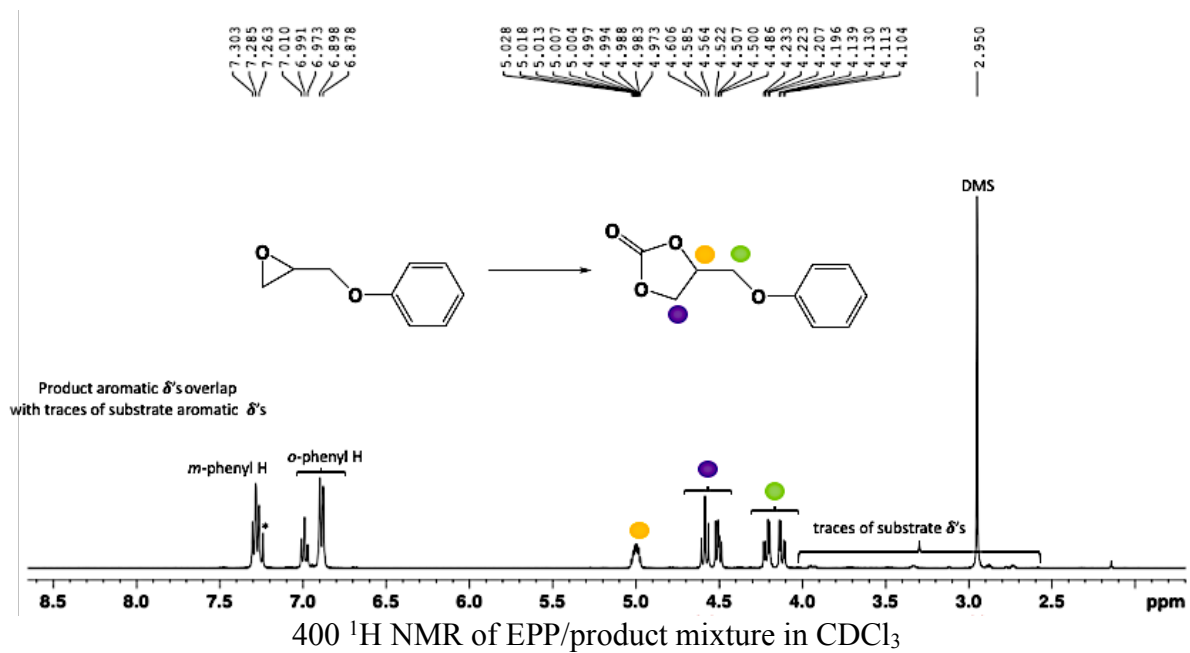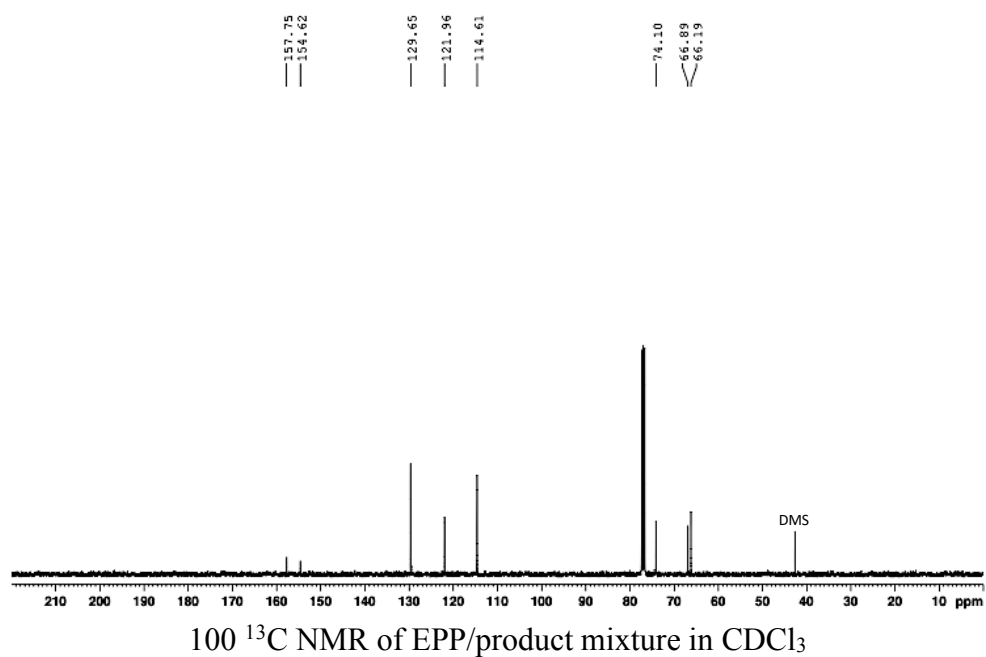

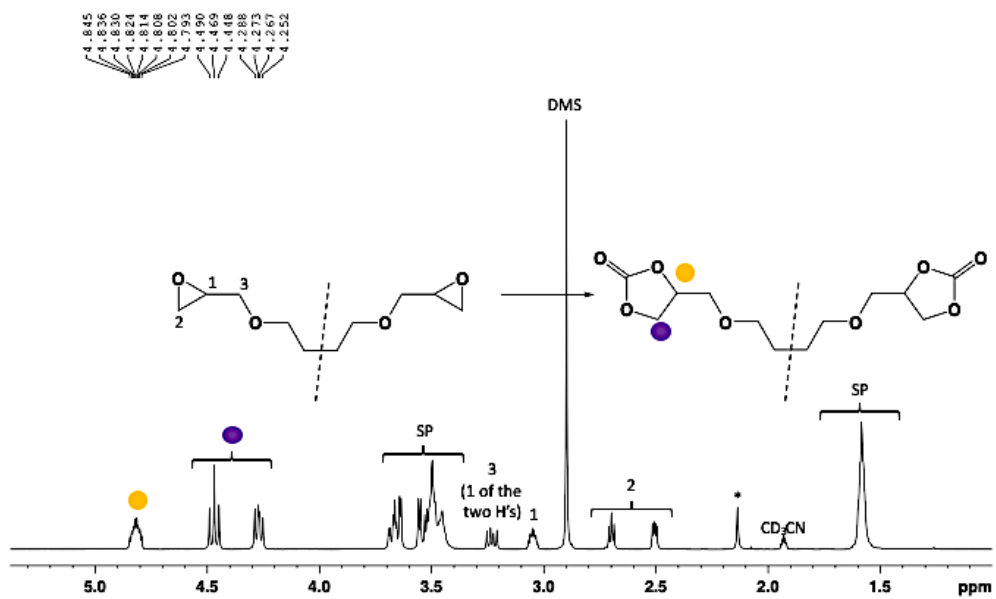

400 <sup>1</sup>H NMR of BDDGE/product mixture in CD<sub>3</sub>CN  
(SP = overlap of substrate and product chemical shifts)

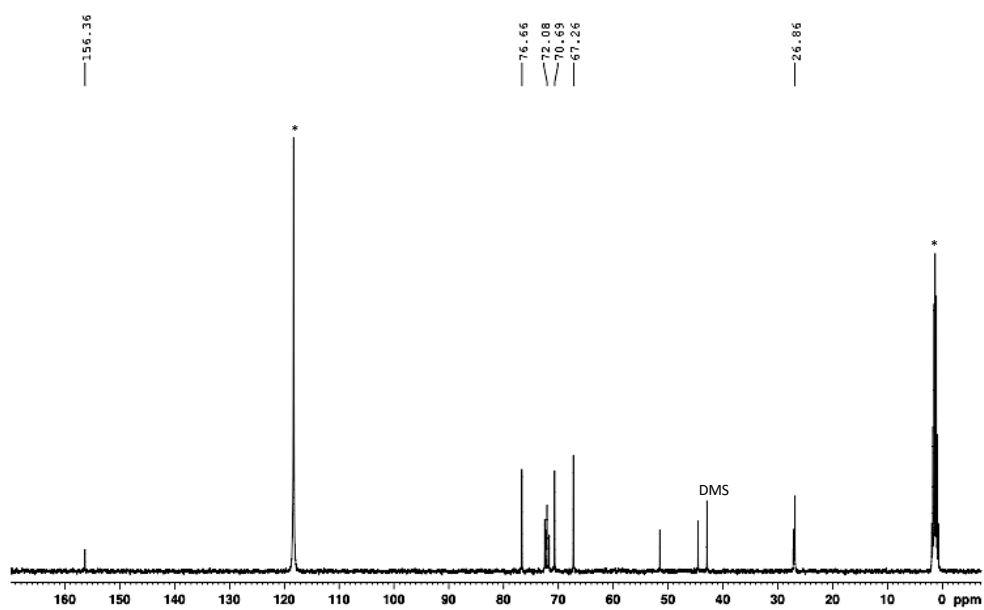

100 <sup>13</sup>C NMR of BDDGE/product mixture in CD<sub>3</sub>CN

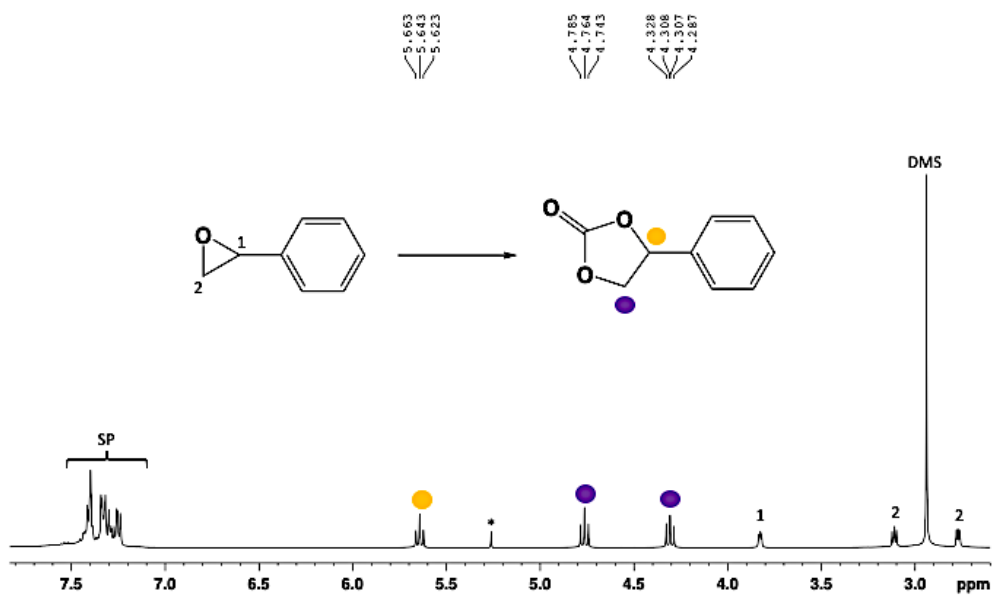

400  $^1\text{H}$  NMR of SO/product mixture in  $\text{CDCl}_3$   
 (SP = overlap of substrate and product chemical shifts)

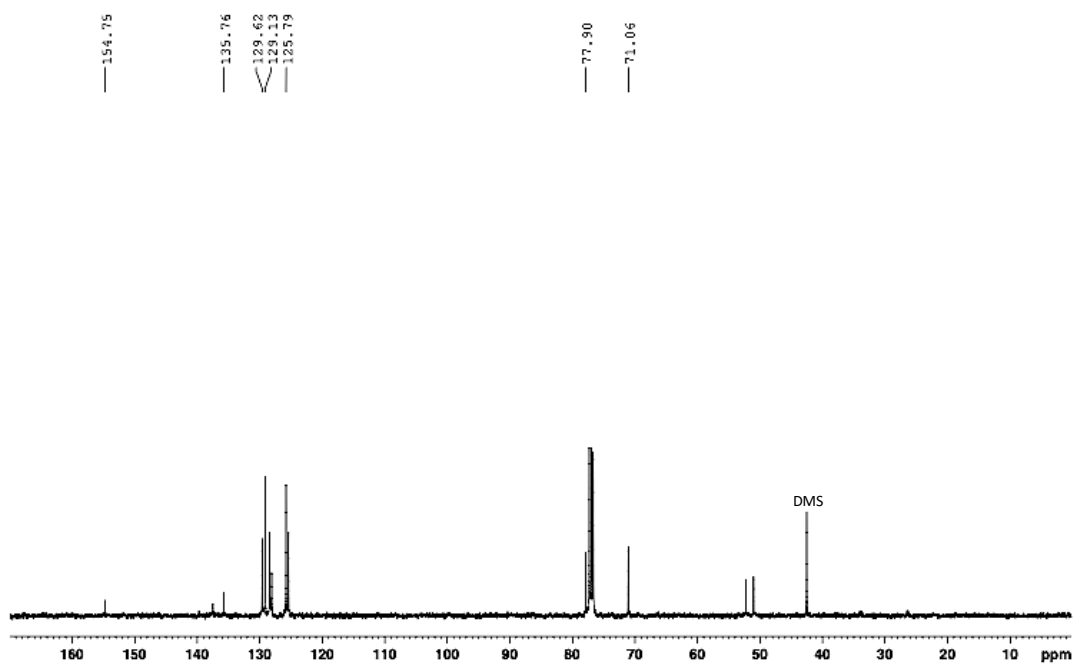

100  $^{13}\text{C}$  NMR of SO/product mixture in  $\text{CDCl}_3$

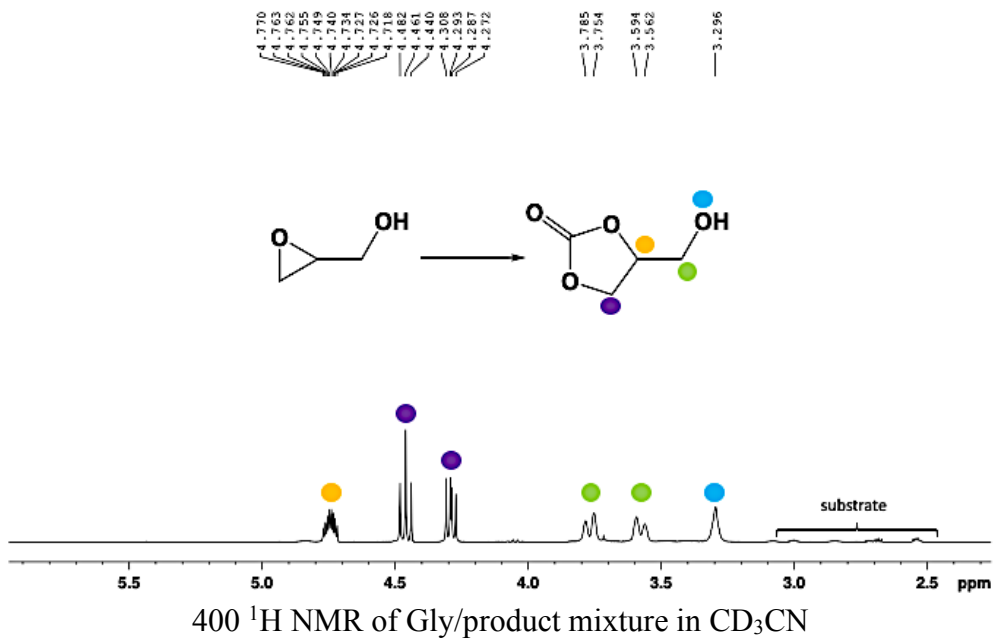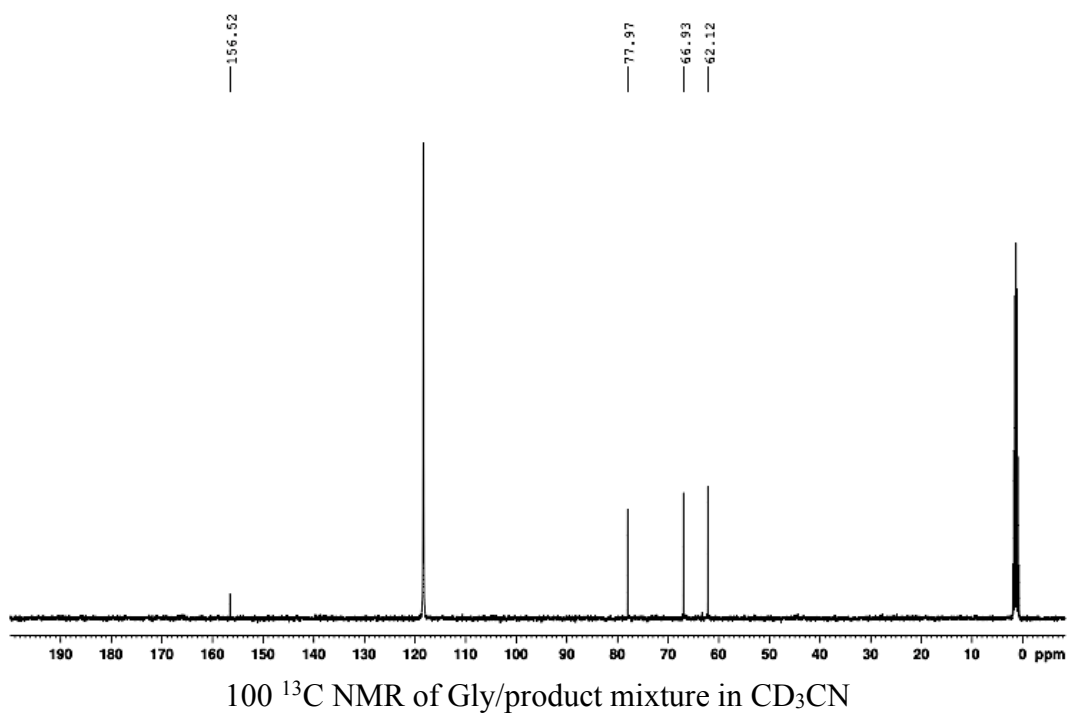



## [6] Mass spectra of cyclic carbonate products

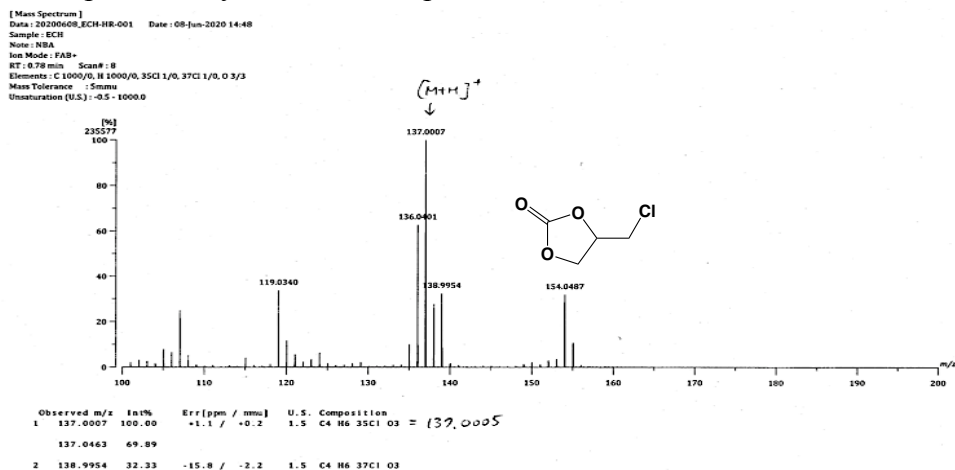

HRMS(FAB) spectrum of 4-(chloromethyl)-1,3-dioxolan-2-one ( $m/z$  137.0007  $[M+H]^+$ )

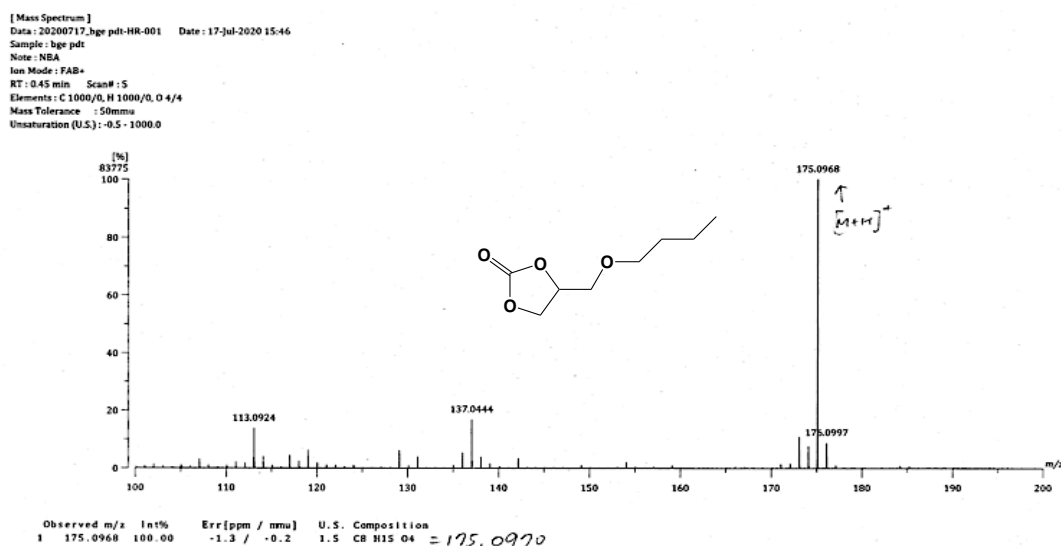

HRMS(FAB) spectrum of 4-(butoxymethyl)-1,3-dioxolan-2-one ( $m/z$  175.0968  $[M+H]^+$ )

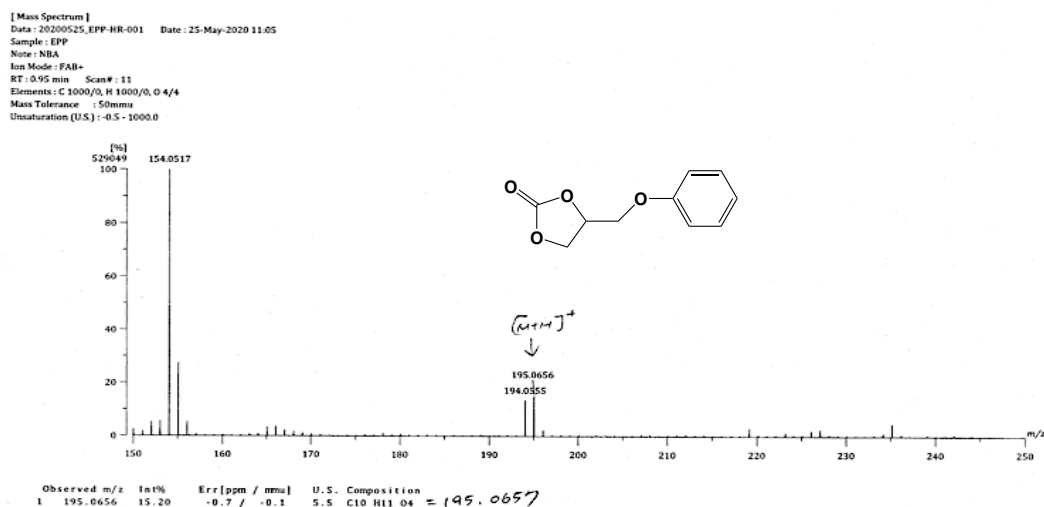

HRMS(FAB) spectrum of 4-(phenoxyethyl)-1,3-dioxolan-2-one ( $m/z$  195.0656  $[M+H]^+$ )

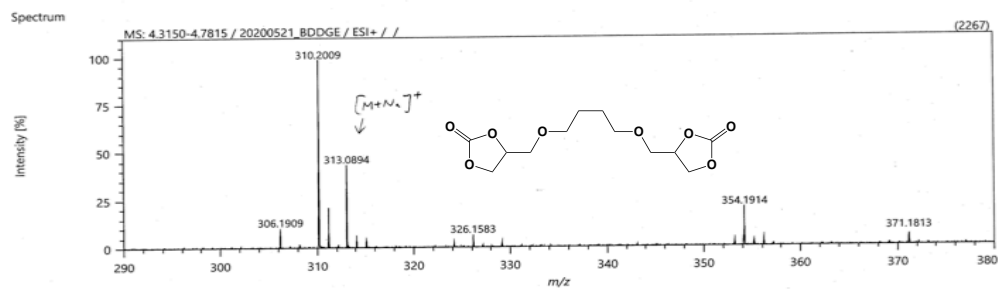

Elemental Composition

Parameters

Tolerance:  $\pm 10.00$  ppm

Electron: Odd/Even

Charge: +1

DBE: -99.0 - 999.0

Elements Set 1:

| Symbol | C    | H    | O | N | Na | S |
|--------|------|------|---|---|----|---|
| Min    | 0    | 0    | 8 | 0 | 1  | 0 |
| Max    | 1000 | 4000 | 8 | 0 | 1  | 0 |

Results

| Mass      | Formula       | Calculated Mass | Mass Difference [mDa] | Mass Difference [ppm] | DBE |
|-----------|---------------|-----------------|-----------------------|-----------------------|-----|
| 313.08941 | C12 H18 O8 Na | 313.08939       | 0.02                  | 0.07                  | 3.5 |

HRMS(ESI) spectrum of 4,4'-((butane-1,4-diylbis(oxy))bis(methylene))bis(1,3-dioxolan-2-one) ( $m/z$  313.0894  $[M+Na]^+$ )

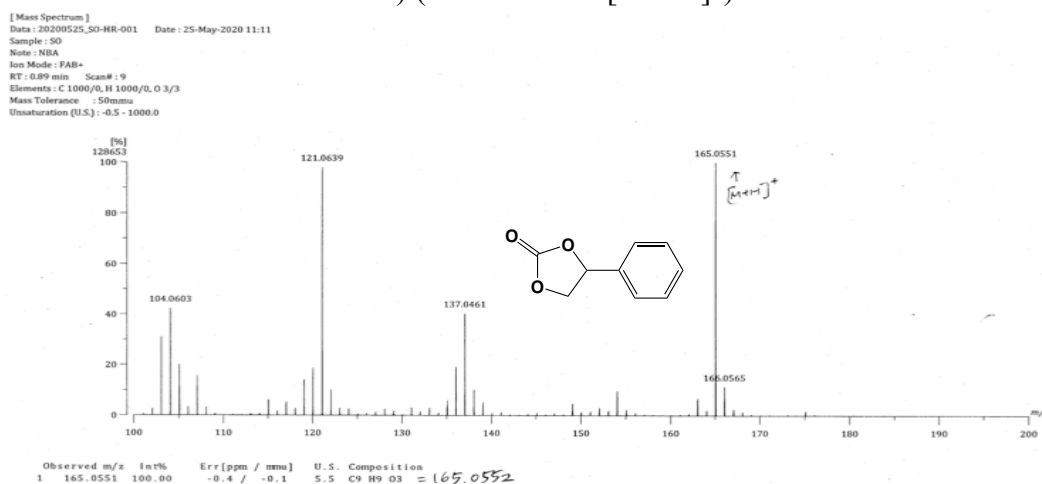

HRMS(FAB) spectrum of 4-phenyl-1,3-dioxolan-2-one ( $m/z$  165.0551  $[M+H]^+$ )

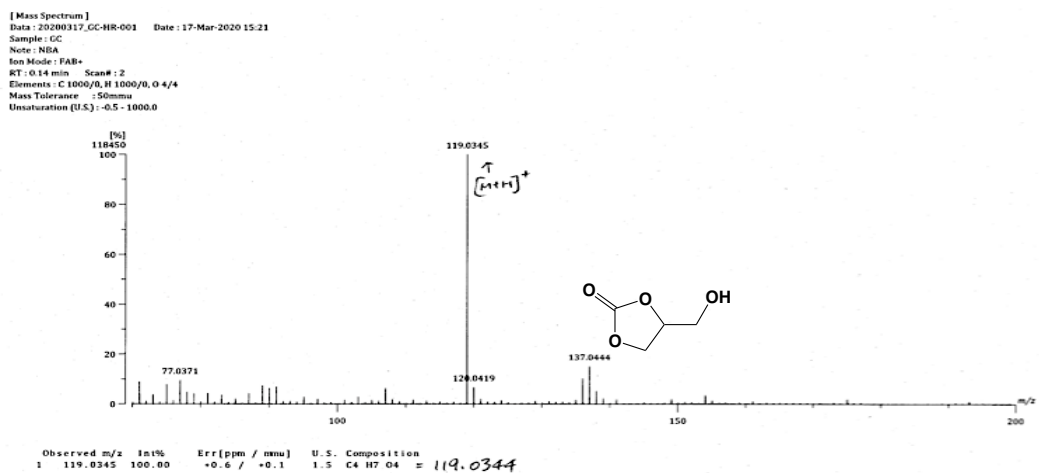

HRMS(FAB) spectrum of 4-(hydroxymethyl)-1,3-dioxolan-2-one ( $m/z$  119.0345  $[M+H]^+$ )

[7] HRMS(ESI) spectrum of **3** after 90 minutes of reaction at Run 3

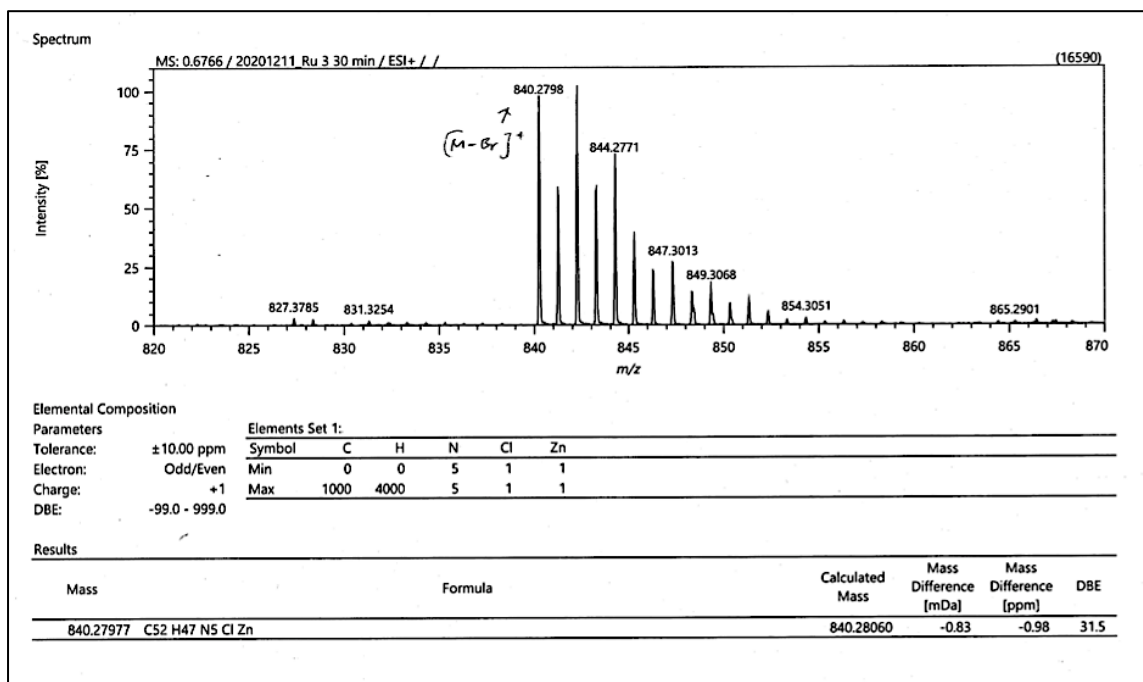

[8] **Global Electrophilicity Index (GEI).** The global electrophilicity index (GEI) was first derived by Parr and co-workers<sup>1</sup> as a measure of a molecule's ability to take up electrons, and is denoted as  $\omega$ .

$$\omega = \frac{\mu^2}{2\eta} = \frac{\chi^2}{2\eta} \quad \text{Eq. S1}$$

In the above equation,  $\mu$  and  $\eta$  are chemical potential and chemical hardness, respectively. Hardness is resistance to deformation or change,<sup>2</sup> and is the reciprocal of softness ( $1/\eta$ ). Moreover,  $\mu$  is the negative of electronegativity,  $\chi$ .<sup>3</sup> Chemical potential and chemical hardness are both related to the energies of the frontier molecular orbitals by the following equations:

$$\mu = \frac{1}{2}(E_{HOMO} + E_{LUMO}) \quad \text{Eq. S2}$$

$$\eta = (E_{LUMO} - E_{HOMO}) \quad \text{Eq. S3}$$

*Table S1 Components of GEI calculation for complexes 1-3 in eV (FMO energies are from DFT calculations performed at the indicated levels of theory)*

| Level of theory | Catalyst | $E_{HOMO}$ | $E_{LUMO}$ | $\chi = (-\mu)$ | $\eta$ | GEI, $\omega$ |
|-----------------|----------|------------|------------|-----------------|--------|---------------|
| M06/6-31g(d)    | 1        | -4.746     | -2.186     | 3.466           | 2.560  | 2.347         |
|                 | 2        | -4.556     | -2.029     | 3.293           | 2.527  | 2.146         |
|                 | 3        | -4.695     | -2.417     | 3.556           | 2.278  | 2.776         |
| B3LYP/6-31g(d)  | 1        | -4.309     | -2.080     | 3.195           | 2.229  | 2.289         |
|                 | 2        | -4.351     | -2.125     | 3.238           | 2.227  | 2.354         |
|                 | 3        | -4.735     | -2.840     | 3.787           | 1.894  | 3.786         |

**Fukui Function.** A tool that can be used to illustrate and compare local reactivities are the Fukui Indices and Dual Descriptors. Fukui<sup>4</sup> Function was first introduced as a Density Functional approach to describe chemical reactivity. It is defined as the response of the chemical potential at a fixed number of electrons to changing external potential.<sup>5</sup> As a reactivity predictor, it takes the following forms:

$$f^+(\vec{r}) = \rho_{N+1}(\vec{r}) - \rho_N(\vec{r}) \quad \text{Eq. S4}$$

$$f^-(\vec{r}) = \rho_N(\vec{r}) - \rho_{N-1}(\vec{r}) \quad \text{Eq. S5}$$

where  $\rho(\vec{r})$  is electron density and  $N$ ,  $N + 1$ , and  $N - 1$  denote the states where the system has  $N$  electrons, one electron added to it (anionic form), and one electron removed from it (cationic form), respectively. The areas of a system that have high  $f^+(\vec{r})$  and  $f^-(\vec{r})$  distributions are the sites favorable to receive electrons (high electrophilicity) and donate electrons (high nucleophilicity), respectively. Moreover, these functions are related to Frontier Molecular Orbital Theory by the following expressions obtained from frozen orbital approximation.<sup>6-7</sup>

$$f^+(\vec{r}) = |\phi_{LUMO}(\vec{r})|^2 \quad \text{Eq. S6}$$

$$f^-(\vec{r}) = |\phi_{HOMO}(\vec{r})|^2 \quad \text{Eq. S7}$$

[9] Cartesian Coordinates of the Optimized Structure of **1**, **2**, and **3** [M06/6-31g(d) level of theory]

Complex **1**

|   |          |          |          |
|---|----------|----------|----------|
| C | 1.020242 | -4.11256 | -0.92587 |
| C | 2.354691 | -3.94207 | -0.77826 |
| C | 2.559825 | -2.55899 | -0.45689 |
| N | 1.374095 | -1.86601 | -0.45585 |
| C | 0.412797 | -2.83638 | -0.69864 |
| C | -2.96155 | 0.28193  | -0.83971 |
| N | -2.84438 | -1.02438 | -0.59558 |
| C | -1.44993 | -1.33039 | -0.57204 |
| C | -0.69529 | -0.14758 | -0.6684  |
| C | -1.68073 | 0.855868 | -0.90443 |
| C | 5.214661 | -0.1587  | 0.709987 |
| C | 5.0187   | 1.16732  | 0.853052 |
| C | 3.682556 | 1.43884  | 0.379373 |
| N | 3.042387 | 0.275999 | 0.015947 |
| C | 3.989358 | -0.70316 | 0.177088 |
| C | 0.159579 | 4.099843 | -1.10179 |
| C | 1.419625 | 4.243132 | -0.6352  |
| C | 1.884904 | 2.928617 | -0.29393 |
| N | 0.94117  | 1.975427 | -0.55728 |
| C | -0.15559 | 2.703505 | -1.02743 |
| C | -0.95711 | -2.63339 | -0.71371 |
| C | -1.43172 | 2.214307 | -1.2012  |
| C | 3.813751 | -2.04298 | -0.11764 |
| C | 3.166139 | 2.708424 | 0.232864 |
| C | -1.83753 | -3.77893 | -1.05598 |
| C | -2.51504 | 3.095883 | -1.69326 |
| C | 4.98041  | -2.95759 | -0.02948 |
| C | -2.03442 | -4.848   | -0.17838 |
| C | -2.88698 | -5.89526 | -0.51392 |
| C | -3.54158 | -5.89515 | -1.74134 |
| C | -3.32805 | -4.85074 | -2.6375  |
| C | -2.48237 | -3.80202 | -2.29762 |
| C | -3.67721 | 3.299443 | -0.94395 |
| C | -4.71065 | 4.086345 | -1.43715 |
| C | -4.59039 | 4.700484 | -2.67912 |
| C | -3.43291 | 4.514844 | -3.43028 |
| C | -2.40542 | 3.715122 | -2.94485 |
| C | 5.021923 | -3.98001 | 0.924217 |
| C | 6.122612 | -4.82348 | 1.017209 |
| C | 7.203332 | -4.65881 | 0.15601  |
| C | 7.175097 | -3.64622 | -0.79744 |
| C | 6.073161 | -2.8032  | -0.88847 |

|    |          |          |          |
|----|----------|----------|----------|
| C  | 4.009255 | 3.884296 | 0.572154 |
| C  | 3.673278 | 4.721087 | 1.640714 |
| C  | 4.459818 | 5.823644 | 1.95437  |
| C  | 5.594033 | 6.109872 | 1.200515 |
| C  | 5.936137 | 5.287904 | 0.131655 |
| C  | 5.149277 | 4.18459  | -0.17938 |
| Ni | 1.161836 | 0.057192 | -0.43328 |
| C  | -3.96586 | -1.83469 | -0.11921 |
| C  | -3.76879 | -2.42793 | 1.286342 |
| H  | 0.484799 | -5.02091 | -1.17609 |
| H  | 3.141441 | -4.67973 | -0.87943 |
| H  | -3.94301 | 0.752634 | -0.83083 |
| H  | 6.094423 | -0.74115 | 0.957053 |
| H  | 5.705187 | 1.912072 | 1.23802  |
| H  | -0.52626 | 4.871216 | -1.43048 |
| H  | 1.998441 | 5.152222 | -0.52604 |
| H  | -1.51283 | -4.84841 | 0.77982  |
| H  | -3.03704 | -6.71626 | 0.185496 |
| H  | -4.2088  | -6.71382 | -2.00479 |
| H  | -3.82327 | -4.85365 | -3.60692 |
| H  | -2.31767 | -2.97885 | -2.99254 |
| H  | -3.80622 | 2.828633 | 0.030574 |
| H  | -5.61359 | 4.197009 | -0.83857 |
| H  | -5.3995  | 5.317703 | -3.06652 |
| H  | -3.33302 | 4.985084 | -4.40754 |
| H  | -1.50871 | 3.548476 | -3.5415  |
| H  | 4.176745 | -4.10222 | 1.601395 |
| H  | 6.139645 | -5.60994 | 1.770249 |
| H  | 8.066067 | -5.31907 | 0.22728  |
| H  | 8.013847 | -3.51362 | -1.479   |
| H  | 6.045766 | -2.01178 | -1.63718 |
| H  | 2.782619 | 4.495025 | 2.227196 |
| H  | 4.186424 | 6.461225 | 2.793743 |
| H  | 6.208767 | 6.974516 | 1.445288 |
| H  | 6.817742 | 5.510175 | -0.4676  |
| H  | 5.409997 | 3.542469 | -1.02046 |
| H  | -4.15011 | -2.65278 | -0.82275 |
| H  | -4.84319 | -1.17173 | -0.12144 |
| H  | -4.29202 | -3.39387 | 1.292626 |
| C  | -4.35119 | -1.63033 | 2.44822  |
| H  | -2.71275 | -2.6897  | 1.442242 |
| Br | -5.74805 | 1.219495 | 1.117299 |
| H  | -4.7777  | -2.30425 | 3.202967 |
| H  | -5.13621 | -0.94103 | 2.095861 |
| N  | -3.39037 | -0.75431 | 3.247797 |
| C  | -4.22858 | 0.079065 | 4.169496 |

|   |          |          |          |
|---|----------|----------|----------|
| H | -4.82905 | -0.58775 | 4.796639 |
| H | -3.56194 | 0.683829 | 4.792182 |
| H | -4.87341 | 0.715361 | 3.543203 |
| C | -2.601   | 0.177694 | 2.375966 |
| H | -1.94283 | -0.40023 | 1.718581 |
| H | -3.32638 | 0.777999 | 1.809264 |
| H | -1.9947  | 0.812433 | 3.030168 |
| C | -2.45834 | -1.59554 | 4.041066 |
| H | -1.80776 | -0.94265 | 4.631224 |
| H | -3.03941 | -2.24245 | 4.706385 |
| H | -1.84633 | -2.20076 | 3.366272 |

### Complex 2

|   |          |          |          |
|---|----------|----------|----------|
| C | -1.42812 | 4.160457 | -0.92453 |
| C | -2.45015 | 4.070118 | -0.04109 |
| C | -2.61625 | 2.675668 | 0.254809 |
| N | -1.69263 | 1.914136 | -0.40818 |
| C | -0.91985 | 2.833249 | -1.1056  |
| C | 2.217513 | -0.42144 | -1.95156 |
| N | 2.087079 | 0.895083 | -2.14546 |
| C | 0.771313 | 1.249664 | -1.71577 |
| C | 0.093763 | 0.115028 | -1.24764 |
| C | 1.030243 | -0.9404  | -1.4275  |
| C | -5.24545 | 0.345745 | 1.618441 |
| C | -5.35928 | -0.93569 | 1.215602 |
| C | -4.18757 | -1.22381 | 0.421617 |
| N | -3.38257 | -0.11735 | 0.314913 |
| C | -4.04306 | 0.865771 | 1.009436 |
| C | -0.87688 | -4.13248 | -1.02372 |
| C | -2.20707 | -4.16017 | -0.78987 |
| C | -2.60874 | -2.80291 | -0.53471 |
| N | -1.56707 | -1.93338 | -0.69155 |
| C | -0.47944 | -2.75569 | -0.9999  |
| C | 0.26097  | 2.554765 | -1.77353 |
| C | 0.79175  | -2.32591 | -1.29582 |
| C | -3.68054 | 2.19936  | 1.033435 |
| C | -3.8877  | -2.48384 | -0.05482 |
| C | 0.90608  | 3.628708 | -2.56776 |
| C | 1.899158 | -3.27651 | -1.54272 |
| C | -4.48677 | 3.18267  | 1.799433 |
| C | 1.518289 | 4.734813 | -1.9717  |
| C | 2.155778 | 5.695781 | -2.74977 |
| C | 2.178836 | 5.571021 | -4.13527 |
| C | 1.551322 | 4.485381 | -4.74097 |
| C | 0.921008 | 3.521966 | -3.96282 |
| C | 3.021904 | -3.25944 | -0.70762 |

|    |          |          |          |
|----|----------|----------|----------|
| C  | 4.086489 | -4.12391 | -0.93497 |
| C  | 4.04892  | -5.00875 | -2.00779 |
| C  | 2.940852 | -5.02835 | -2.85063 |
| C  | 1.872387 | -4.16911 | -2.62079 |
| C  | -3.90211 | 3.899744 | 2.848799 |
| C  | -4.63388 | 4.838798 | 3.565792 |
| C  | -5.96617 | 5.079692 | 3.244217 |
| C  | -6.5585  | 4.378763 | 2.198631 |
| C  | -5.82381 | 3.441465 | 1.480728 |
| C  | -4.9222  | -3.54592 | 0.056833 |
| C  | -4.8067  | -4.58261 | 0.988166 |
| C  | -5.79825 | -5.55058 | 1.099555 |
| C  | -6.92408 | -5.4953  | 0.283138 |
| C  | -7.05341 | -4.46539 | -0.64267 |
| C  | -6.06044 | -3.49793 | -0.75275 |
| Ni | -1.63347 | -0.00635 | -0.51562 |
| C  | 3.255756 | 1.750327 | -2.33495 |
| C  | 3.80773  | 2.267712 | -1.00952 |
| H  | -1.03243 | 5.050187 | -1.39997 |
| H  | -3.07559 | 4.864834 | 0.347865 |
| H  | 3.144987 | -0.93515 | -2.18989 |
| H  | -5.91017 | 0.911407 | 2.260349 |
| H  | -6.13272 | -1.65477 | 1.4593   |
| H  | -0.20619 | -4.96154 | -1.21582 |
| H  | -2.86656 | -5.01849 | -0.75414 |
| H  | 1.500726 | 4.827239 | -0.88552 |
| H  | 2.63733  | 6.546879 | -2.27041 |
| H  | 2.678865 | 6.322931 | -4.74328 |
| H  | 1.554008 | 4.388332 | -5.82532 |
| H  | 0.440196 | 2.661572 | -4.42812 |
| H  | 3.072779 | -2.5921  | 0.155583 |
| H  | 4.929445 | -4.08883 | -0.24489 |
| H  | 4.881903 | -5.68696 | -2.18795 |
| H  | 2.90839  | -5.71338 | -3.69697 |
| H  | 1.010242 | -4.17261 | -3.28798 |
| H  | -2.85864 | 3.706695 | 3.097848 |
| H  | -4.16183 | 5.382528 | 4.382876 |
| H  | -6.54078 | 5.814802 | 3.805431 |
| H  | -7.59748 | 4.568911 | 1.93355  |
| H  | -6.28245 | 2.905515 | 0.650012 |
| H  | -3.92897 | -4.61665 | 1.633528 |
| H  | -5.69374 | -6.34807 | 1.833671 |
| H  | -7.7009  | -6.25312 | 0.371808 |
| H  | -7.93189 | -4.41496 | -1.28421 |
| H  | -6.15835 | -2.68719 | -1.47461 |
| H  | 3.007239 | 2.577208 | -3.0036  |



|    |          |          |          |
|----|----------|----------|----------|
| H  | 4.011663 | 1.137662 | -2.84715 |
| H  | 4.427553 | 3.156139 | -1.21032 |
| C  | 4.623333 | 1.232647 | -0.25139 |
| H  | 2.966393 | 2.612986 | -0.38802 |
| Br | 5.111665 | -2.54299 | 2.149159 |
| H  | 5.539732 | 1.002827 | -0.82162 |
| C  | 4.990679 | 1.697124 | 1.15491  |
| H  | 4.071895 | 1.708159 | 1.759665 |
| H  | 5.367078 | 2.733029 | 1.124142 |
| H  | 4.075588 | 0.279442 | -0.16384 |
| C  | 6.018805 | 0.743483 | 1.724113 |
| H  | 7.011974 | 0.937765 | 1.294474 |
| H  | 5.740854 | -0.30824 | 1.520941 |
| N  | 6.214929 | 0.802884 | 3.231883 |
| C  | 7.277202 | -0.19793 | 3.583788 |
| C  | 6.645495 | 2.156812 | 3.658343 |
| C  | 4.955255 | 0.416795 | 3.954363 |
| H  | 5.851676 | 2.877906 | 3.444906 |
| H  | 8.198248 | 0.08065  | 3.061683 |
| H  | 7.433509 | -0.16659 | 4.66687  |
| H  | 6.917288 | -1.18972 | 3.258858 |
| H  | 6.847777 | 2.141421 | 4.73414  |
| H  | 7.554805 | 2.429651 | 3.112331 |
| H  | 4.635972 | -0.5663  | 3.566569 |
| H  | 5.188996 | 0.359608 | 5.022361 |
| H  | 4.195781 | 1.184061 | 3.786283 |

### Complex 3

|   |          |          |          |
|---|----------|----------|----------|
| N | 1.976634 | -0.55162 | 0.867294 |
| N | -1.7839  | 2.050166 | -0.34041 |
| N | -3.84975 | 0.060252 | -0.0467  |
| N | -1.78268 | -1.94233 | -0.20419 |
| C | 0.425679 | -0.01105 | -0.6695  |
| C | 1.969157 | 0.787627 | 0.741174 |
| C | 1.028729 | 1.178105 | -0.20884 |
| C | 0.633346 | 2.543141 | -0.37659 |
| C | -0.69657 | 2.899287 | -0.49336 |
| C | -1.15355 | 4.254675 | -0.69159 |
| C | -2.49961 | 4.231185 | -0.59081 |
| C | -2.87931 | 2.853718 | -0.36128 |
| C | -4.22727 | 2.472786 | -0.15765 |
| C | -4.65827 | 1.154803 | -0.03866 |
| C | -6.04807 | 0.740121 | -0.02367 |
| C | -6.05235 | -0.60993 | -0.06468 |
| C | -4.66536 | -1.0325  | -0.11143 |
| C | -4.23437 | -2.3432  | -0.27096 |

|   |          |          |          |
|---|----------|----------|----------|
| C | -2.87357 | -2.72772 | -0.38409 |
| C | -2.4815  | -4.08129 | -0.70096 |
| C | -1.13078 | -4.11801 | -0.64943 |
| C | -0.68878 | -2.78765 | -0.30776 |
| C | 0.64032  | -2.45422 | -0.06783 |
| C | 1.011235 | -1.07867 | 0.002059 |
| C | 1.638348 | -3.51825 | 0.129046 |
| C | 1.353349 | -4.62039 | 0.954245 |
| C | 2.294992 | -5.62029 | 1.150454 |
| C | 3.541013 | -5.53645 | 0.532926 |
| C | 3.844103 | -4.44224 | -0.27015 |
| C | 2.903282 | -3.43819 | -0.46844 |
| C | 1.688517 | 3.568269 | -0.26814 |
| C | 2.860624 | 3.454034 | -1.03016 |
| C | 3.860735 | 4.416539 | -0.94429 |
| C | 3.731707 | 5.489994 | -0.06663 |
| C | 2.590461 | 5.594883 | 0.722783 |
| C | 1.579605 | 4.646813 | 0.621574 |
| C | -5.26536 | 3.538724 | -0.10757 |
| C | -5.62467 | 4.25951  | -1.25057 |
| C | -6.60518 | 5.243502 | -1.19139 |
| C | -7.24895 | 5.516709 | 0.011916 |
| C | -6.90667 | 4.800201 | 1.15406  |
| C | -5.92177 | 3.820194 | 1.094274 |
| C | -5.26221 | -3.41481 | -0.36681 |
| C | -6.13547 | -3.478   | -1.45711 |
| C | -7.09532 | -4.48048 | -1.54274 |
| C | -7.19481 | -5.43892 | -0.53948 |
| C | -6.32914 | -5.38913 | 0.549151 |
| C | -5.371   | -4.38576 | 0.633823 |
| H | 2.530087 | 1.417558 | 1.422355 |
| H | -0.51593 | 5.10728  | -0.89513 |
| H | -3.18792 | 5.064708 | -0.66095 |
| H | -6.8998  | 1.410303 | -0.01681 |
| H | -6.90996 | -1.27186 | -0.08048 |
| H | -3.16182 | -4.88977 | -0.94101 |
| H | -0.47882 | -4.95523 | -0.86723 |
| H | 0.3938   | -4.66368 | 1.467539 |
| H | 2.059795 | -6.46141 | 1.800878 |
| H | 4.282302 | -6.31831 | 0.691724 |
| H | 4.822779 | -4.32354 | -0.73455 |
| H | 3.186075 | -2.58202 | -1.08501 |
| H | 2.958445 | 2.616455 | -1.72212 |
| H | 4.73947  | 4.341483 | -1.58648 |
| H | 4.514543 | 6.244229 | -0.00056 |
| H | 2.48677  | 6.418045 | 1.427603 |

|    |          |          |          |
|----|----------|----------|----------|
| H  | 0.696589 | 4.716974 | 1.254657 |
| H  | -5.12652 | 4.035393 | -2.19417 |
| H  | -6.8737  | 5.794491 | -2.09155 |
| H  | -8.01823 | 6.285748 | 0.058858 |
| H  | -7.4057  | 5.007107 | 2.09955  |
| H  | -5.64579 | 3.259027 | 1.987089 |
| H  | -6.04827 | -2.73027 | -2.24542 |
| H  | -7.76429 | -4.51568 | -2.40121 |
| H  | -7.94533 | -6.22477 | -0.60682 |
| H  | -6.4039  | -6.13362 | 1.340254 |
| H  | -4.69482 | -4.34065 | 1.487461 |
| C  | 2.658684 | -1.20736 | 1.99094  |
| H  | 2.222375 | -2.20257 | 2.111476 |
| H  | 2.396395 | -0.63363 | 2.891884 |
| C  | 4.168603 | -1.30388 | 1.812528 |
| H  | 4.568568 | -1.83652 | 2.689712 |
| H  | 4.410895 | -1.91023 | 0.927544 |
| C  | 4.866124 | 0.037588 | 1.65374  |
| H  | 4.465256 | 0.523167 | 0.753731 |
| H  | 4.633806 | 0.706087 | 2.503635 |
| C  | 6.375713 | -0.11    | 1.509863 |
| H  | 6.795915 | -0.50659 | 2.446202 |
| H  | 6.581246 | -0.86177 | 0.729004 |
| C  | 7.084999 | 1.203183 | 1.229588 |
| H  | 6.531254 | 2.047033 | 1.667667 |
| N  | 7.291262 | 1.584344 | -0.23353 |
| C  | 6.007537 | 1.578356 | -1.01412 |
| H  | 5.27675  | 2.19739  | -0.48254 |
| H  | 6.221394 | 2.016405 | -1.99596 |
| H  | 5.668742 | 0.536172 | -1.15327 |
| C  | 8.269792 | 0.65451  | -0.89206 |
| H  | 9.17472  | 0.61361  | -0.27724 |
| H  | 7.801394 | -0.33637 | -1.02409 |
| H  | 8.504733 | 1.065113 | -1.87938 |
| C  | 7.847135 | 2.96588  | -0.25031 |
| H  | 7.108837 | 3.654139 | 0.17541  |
| H  | 8.770247 | 2.991783 | 0.337984 |
| H  | 8.061017 | 3.249061 | -1.28525 |
| Br | 5.925809 | -1.86509 | -1.52294 |
| H  | -0.24183 | -0.10775 | -1.52002 |
| Zn | -1.89539 | 0.067769 | 0.397122 |
| Cl | -1.16979 | 0.144449 | 2.525064 |
| H  | 8.098794 | 1.215546 | 1.650498 |

[10] Cartesian Coordinates of the Optimized Structure of **1**, **2**, and **3** [B3LYP/6-31g(d) level of theory]

Complex **1**

|   |          |          |          |
|---|----------|----------|----------|
| C | 0.585609 | 4.065106 | 1.129592 |
| C | 1.758199 | 4.18692  | 0.45496  |
| C | 2.145856 | 2.862226 | 0.047521 |
| N | 1.217371 | 1.929244 | 0.456684 |
| C | 0.214601 | 2.676311 | 1.076036 |
| C | -2.56569 | -1.01512 | 1.08135  |
| N | -2.66349 | 0.297348 | 1.304399 |
| C | -1.3477  | 0.853159 | 1.185302 |
| C | -0.43214 | -0.16302 | 0.83361  |
| C | -1.22404 | -1.35355 | 0.821755 |
| C | 5.186114 | 0.992376 | -1.21342 |
| C | 5.408003 | -0.31352 | -0.93914 |
| C | 4.204883 | -0.81848 | -0.30978 |
| N | 3.25883  | 0.178786 | -0.19062 |
| C | 3.86957  | 1.310353 | -0.69744 |
| C | 1.192423 | -4.23799 | 0.684661 |
| C | 2.53172  | -4.0706  | 0.574408 |
| C | 2.763958 | -2.65746 | 0.395875 |
| N | 1.587182 | -1.94643 | 0.475177 |
| C | 0.597042 | -2.92746 | 0.647377 |
| C | -1.03881 | 2.198351 | 1.452408 |
| C | -0.76097 | -2.69123 | 0.761388 |
| C | 3.358751 | 2.597372 | -0.61117 |
| C | 4.025981 | -2.14574 | 0.049754 |
| C | -1.95905 | 3.122905 | 2.184804 |
| C | -1.73135 | -3.81545 | 0.890119 |
| C | 4.143619 | 3.751538 | -1.14921 |
| C | -2.55946 | 4.227716 | 1.560539 |
| C | -3.39919 | 5.083379 | 2.277581 |
| C | -3.64836 | 4.850713 | 3.631566 |
| C | -3.04861 | 3.75984  | 4.266576 |
| C | -2.21094 | 2.904252 | 3.55027  |
| C | -2.79035 | -3.9388  | -0.0248  |
| C | -3.72692 | -4.96521 | 0.1018   |
| C | -3.62109 | -5.8912  | 1.141125 |
| C | -2.57794 | -5.77429 | 2.06379  |
| C | -1.64509 | -4.74367 | 1.943606 |
| C | 3.643754 | 4.505086 | -2.22405 |
| C | 4.362091 | 5.586781 | -2.7356  |
| C | 5.593443 | 5.938402 | -2.17773 |
| C | 6.099432 | 5.201803 | -1.10456 |
| C | 5.380402 | 4.119281 | -0.59453 |

|    |          |          |          |
|----|----------|----------|----------|
| C  | 5.20442  | -3.06861 | -0.01572 |
| C  | 5.328261 | -4.02736 | -1.03414 |
| C  | 6.439889 | -4.86979 | -1.09004 |
| C  | 7.448243 | -4.76705 | -0.12865 |
| C  | 7.338957 | -3.81498 | 0.886818 |
| C  | 6.226804 | -2.97244 | 0.941167 |
| Ni | 1.400288 | -0.00234 | 0.40816  |
| C  | -3.96325 | 0.975399 | 1.343214 |
| C  | -4.33591 | 1.668214 | 0.002277 |
| H  | 0.007505 | 4.847563 | 1.598028 |
| H  | 2.333181 | 5.082563 | 0.271265 |
| H  | -3.4413  | -1.64808 | 1.096253 |
| H  | 5.84661  | 1.693985 | -1.70136 |
| H  | 6.282974 | -0.90628 | -1.16304 |
| H  | 0.645154 | -5.16337 | 0.783069 |
| H  | 3.300038 | -4.82909 | 0.569077 |
| H  | -2.36553 | 4.414121 | 0.50803  |
| H  | -3.85541 | 5.933487 | 1.777295 |
| H  | -4.29979 | 5.517296 | 4.189823 |
| H  | -3.22771 | 3.577536 | 5.322678 |
| H  | -1.74191 | 2.060022 | 4.048017 |
| H  | -2.90976 | -3.22787 | -0.83759 |
| H  | -4.53875 | -5.01401 | -0.61833 |
| H  | -4.34932 | -6.69213 | 1.239192 |
| H  | -2.49474 | -6.47964 | 2.886712 |
| H  | -0.85256 | -4.64419 | 2.679791 |
| H  | 2.688331 | 4.231523 | -2.6634  |
| H  | 3.960949 | 6.152329 | -3.57258 |
| H  | 6.153365 | 6.780709 | -2.57509 |
| H  | 7.053036 | 5.47217  | -0.6587  |
| H  | 5.773069 | 3.556632 | 0.247741 |
| H  | 4.549737 | -4.10562 | -1.78802 |
| H  | 6.519732 | -5.60314 | -1.8882  |
| H  | 8.313413 | -5.4232  | -0.17229 |
| H  | 8.11835  | -3.72763 | 1.639271 |
| H  | 6.14327  | -2.23386 | 1.733813 |
| H  | -3.9664  | 1.699292 | 2.153442 |
| H  | -4.69778 | 0.206531 | 1.599376 |
| H  | -4.65075 | 2.691856 | 0.22137  |
| C  | -5.45186 | 0.899042 | -0.70644 |
| H  | -3.43799 | 1.731318 | -0.61874 |
| Br | -5.16839 | -2.38659 | -2.40695 |
| H  | -6.36461 | 0.926682 | -0.10395 |
| H  | -5.18785 | -0.14911 | -0.89132 |
| N  | -5.85541 | 1.449905 | -2.07791 |
| C  | -7.08702 | 0.697718 | -2.52859 |

|   |          |          |          |
|---|----------|----------|----------|
| H | -7.89134 | 0.894223 | -1.81815 |
| H | -7.36497 | 1.060359 | -3.51941 |
| H | -6.83797 | -0.36752 | -2.56113 |
| C | -4.75679 | 1.206799 | -3.0861  |
| H | -3.86147 | 1.744726 | -2.77647 |
| H | -4.57615 | 0.12825  | -3.12837 |
| H | -5.09526 | 1.581841 | -4.05315 |
| C | -6.17592 | 2.915095 | -2.01187 |
| H | -6.5844  | 3.222539 | -2.97523 |
| H | -6.91395 | 3.082645 | -1.22545 |
| H | -5.26841 | 3.479957 | -1.80339 |

### Complex 2

|   |          |          |          |
|---|----------|----------|----------|
| C | -1.47554 | 4.204514 | -0.81637 |
| C | -2.50114 | 4.09913  | 0.068081 |
| C | -2.67799 | 2.696589 | 0.337982 |
| N | -1.75203 | 1.943298 | -0.35106 |
| C | -0.96966 | 2.875252 | -1.03322 |
| C | 2.161644 | -0.39038 | -1.95401 |
| N | 2.043078 | 0.928702 | -2.1169  |
| C | 0.726926 | 1.296434 | -1.67801 |
| C | 0.038459 | 0.148084 | -1.22552 |
| C | 0.965686 | -0.91708 | -1.43051 |
| C | -5.31686 | 0.336693 | 1.67732  |
| C | -5.43708 | -0.94156 | 1.250052 |
| C | -4.26787 | -1.22425 | 0.442408 |
| N | -3.45538 | -0.11275 | 0.35468  |
| C | -4.11036 | 0.867794 | 1.074853 |
| C | -0.96569 | -4.12415 | -1.10428 |
| C | -2.29915 | -4.15115 | -0.86524 |
| C | -2.69988 | -2.79542 | -0.56957 |
| N | -1.64265 | -1.925   | -0.70845 |
| C | -0.55444 | -2.74616 | -1.04123 |
| C | 0.219495 | 2.607125 | -1.71038 |
| C | 0.723468 | -2.30673 | -1.32733 |
| C | -3.7413  | 2.205053 | 1.115802 |
| C | -3.97539 | -2.47994 | -0.07063 |
| C | 0.854402 | 3.7267   | -2.47455 |
| C | 1.833099 | -3.27117 | -1.5866  |
| C | -4.54301 | 3.179017 | 1.919997 |
| C | 1.495445 | 4.796928 | -1.83171 |
| C | 2.061496 | 5.83701  | -2.57222 |
| C | 1.989041 | 5.826852 | -3.96659 |
| C | 1.34297  | 4.772366 | -4.61712 |
| C | 0.779579 | 3.731649 | -3.8776  |
| C | 2.921064 | -3.34125 | -0.70049 |

|    |          |          |          |
|----|----------|----------|----------|
| C  | 3.974868 | -4.22622 | -0.93469 |
| C  | 3.963103 | -5.04931 | -2.06255 |
| C  | 2.890411 | -4.98278 | -2.95579 |
| C  | 1.834186 | -4.10095 | -2.72068 |
| C  | -3.96266 | 3.826917 | 3.022844 |
| C  | -4.69317 | 4.743305 | 3.780744 |
| C  | -6.01841 | 5.031966 | 3.44696  |
| C  | -6.60617 | 4.399555 | 2.34925  |
| C  | -5.87437 | 3.48292  | 1.592094 |
| C  | -5.02368 | -3.54733 | 0.010538 |
| C  | -4.93453 | -4.59166 | 0.944992 |
| C  | -5.92763 | -5.56968 | 1.019756 |
| C  | -7.02887 | -5.51955 | 0.16167  |
| C  | -7.13141 | -4.48396 | -0.76926 |
| C  | -6.13756 | -3.50574 | -0.84248 |
| Ni | -1.69477 | 0.014743 | -0.491   |
| C  | 3.213618 | 1.767588 | -2.42042 |
| C  | 3.939308 | 2.27292  | -1.16056 |
| H  | -1.07601 | 5.103537 | -1.26137 |
| H  | -3.11337 | 4.889153 | 0.477427 |
| H  | 3.074669 | -0.90583 | -2.21708 |
| H  | -5.98248 | 0.889696 | 2.323678 |
| H  | -6.21495 | -1.65482 | 1.481307 |
| H  | -0.31023 | -4.95385 | -1.32505 |
| H  | -2.95581 | -5.00805 | -0.84697 |
| H  | 1.549856 | 4.810818 | -0.74691 |
| H  | 2.556885 | 6.656103 | -2.05771 |
| H  | 2.428041 | 6.636884 | -4.54246 |
| H  | 1.27248  | 4.761673 | -5.70142 |
| H  | 0.274943 | 2.914438 | -4.38565 |
| H  | 2.952855 | -2.72387 | 0.193365 |
| H  | 4.789816 | -4.25479 | -0.21649 |
| H  | 4.783165 | -5.73881 | -2.2462  |
| H  | 2.875328 | -5.61492 | -3.84007 |
| H  | 1.007595 | -4.04482 | -3.42377 |
| H  | -2.93309 | 3.601858 | 3.287468 |
| H  | -4.2274  | 5.229077 | 4.634228 |
| H  | -6.58801 | 5.745338 | 4.036534 |
| H  | -7.63437 | 4.622999 | 2.076914 |
| H  | -6.3324  | 3.00251  | 0.73206  |
| H  | -4.08393 | -4.6301  | 1.619915 |
| H  | -5.84256 | -6.36822 | 1.752117 |
| H  | -7.80197 | -6.2811  | 0.219669 |
| H  | -7.98452 | -4.43634 | -1.44102 |
| H  | -6.21896 | -2.70154 | -1.56877 |
| H  | 2.901349 | 2.601647 | -3.04182 |

|    |          |          |          |
|----|----------|----------|----------|
| H  | 3.888277 | 1.148489 | -3.02103 |
| H  | 4.609301 | 3.085779 | -1.47015 |
| C  | 4.747783 | 1.187743 | -0.43992 |
| H  | 3.203891 | 2.716181 | -0.47857 |
| Br | 5.100745 | -2.74347 | 2.407273 |
| H  | 5.554533 | 0.843733 | -1.1028  |
| C  | 5.343411 | 1.669103 | 0.894357 |
| H  | 4.520393 | 1.870037 | 1.589102 |
| H  | 5.878974 | 2.614143 | 0.741515 |
| H  | 4.11625  | 0.314445 | -0.23908 |
| C  | 6.28109  | 0.593213 | 1.439907 |
| H  | 7.198203 | 0.553579 | 0.84503  |
| H  | 5.81136  | -0.39741 | 1.423189 |
| N  | 6.744277 | 0.778511 | 2.888084 |
| C  | 7.749887 | -0.30903 | 3.184573 |
| C  | 7.388374 | 2.11787  | 3.0879   |
| C  | 5.583347 | 0.616982 | 3.840093 |
| H  | 6.647165 | 2.902493 | 2.939965 |
| H  | 8.602374 | -0.18279 | 2.515486 |
| H  | 8.069788 | -0.2085  | 4.222807 |
| H  | 7.258338 | -1.27282 | 3.019722 |
| H  | 7.779965 | 2.167579 | 4.104868 |
| H  | 8.202459 | 2.228865 | 2.369633 |
| H  | 5.141353 | -0.36843 | 3.662672 |
| H  | 5.967535 | 0.693968 | 4.858474 |
| H  | 4.859196 | 1.41044  | 3.660253 |

### Complex 3

|   |          |          |          |
|---|----------|----------|----------|
| N | -1.90436 | 0.757992 | -0.10047 |
| N | 2.858186 | 0.750832 | 0.605376 |
| N | 3.590997 | -1.6665  | -0.85754 |
| N | 0.765187 | -2.38516 | -0.81055 |
| C | -0.03852 | -0.04432 | 0.877939 |
| C | -1.19374 | 1.812233 | 0.349051 |
| C | -0.01905 | 1.369444 | 0.974135 |
| C | 1.034599 | 2.231647 | 1.422076 |
| C | 2.3716   | 1.857025 | 1.306559 |
| C | 3.480078 | 2.612303 | 1.848694 |
| C | 4.618151 | 1.997831 | 1.440251 |
| C | 4.22158  | 0.845367 | 0.653879 |
| C | 5.171804 | -0.00358 | 0.017826 |
| C | 4.855781 | -1.17009 | -0.68066 |
| C | 5.821152 | -2.10141 | -1.24705 |
| C | 5.118139 | -3.15431 | -1.73351 |
| C | 3.712704 | -2.89195 | -1.45418 |
| C | 2.656633 | -3.78278 | -1.67364 |



|   |          |          |          |
|---|----------|----------|----------|
| C | 1.312183 | -3.55004 | -1.27138 |
| C | 0.316552 | -4.60665 | -1.27323 |
| C | -0.84135 | -4.06306 | -0.82796 |
| C | -0.58361 | -2.65892 | -0.56985 |
| C | -1.57315 | -1.74939 | -0.19055 |
| C | -1.19991 | -0.42319 | 0.210374 |
| C | -2.99856 | -2.16351 | -0.1521  |
| C | -3.61744 | -2.8203  | -1.23389 |
| C | -4.95535 | -3.20607 | -1.15976 |
| C | -5.70407 | -2.93661 | -0.01079 |
| C | -5.10997 | -2.27569 | 1.067527 |
| C | -3.77024 | -1.89423 | 0.994319 |
| C | 0.650458 | 3.564761 | 1.944633 |
| C | -0.39016 | 3.674114 | 2.888539 |
| C | -0.77649 | 4.917715 | 3.386058 |
| C | -0.14627 | 6.081051 | 2.937032 |
| C | 0.872625 | 5.99095  | 1.98531  |
| C | 1.268172 | 4.74767  | 1.493774 |
| C | 6.62316  | 0.364044 | 0.123089 |
| C | 7.336621 | 0.167036 | 1.316061 |
| C | 8.689607 | 0.500349 | 1.40149  |
| C | 9.352691 | 1.033184 | 0.293466 |
| C | 8.654501 | 1.230837 | -0.89953 |
| C | 7.300436 | 0.899681 | -0.98326 |
| C | 2.964675 | -5.10002 | -2.31842 |
| C | 3.747678 | -6.06615 | -1.66594 |
| C | 4.02908  | -7.28967 | -2.27685 |
| C | 3.530579 | -7.56928 | -3.55105 |
| C | 2.747862 | -6.61821 | -4.2097  |
| C | 2.46682  | -5.39553 | -3.59811 |
| H | -1.49428 | 2.823127 | 0.118099 |
| H | 3.391396 | 3.48553  | 2.478444 |
| H | 5.636852 | 2.289365 | 1.648351 |
| H | 6.892923 | -1.96437 | -1.2478  |
| H | 5.504319 | -4.04065 | -2.21525 |
| H | 0.498415 | -5.6324  | -1.55804 |
| H | -1.78182 | -4.56512 | -0.65747 |
| H | -3.04963 | -3.00411 | -2.14092 |
| H | -5.41676 | -3.70534 | -2.0076  |
| H | -6.74954 | -3.22832 | 0.039427 |
| H | -5.69018 | -2.01194 | 1.948453 |
| H | -3.31228 | -1.387   | 1.83911  |
| H | -0.87322 | 2.771725 | 3.25118  |
| H | -1.56495 | 4.976878 | 4.131723 |
| H | -0.44886 | 7.050878 | 3.32252  |
| H | 1.355556 | 6.891706 | 1.616587 |

|    |          |          |          |
|----|----------|----------|----------|
| H  | 2.040347 | 4.687526 | 0.733577 |
| H  | 6.826347 | -0.25474 | 2.177954 |
| H  | 9.226427 | 0.338064 | 2.332463 |
| H  | 10.40621 | 1.291263 | 0.359457 |
| H  | 9.161671 | 1.64573  | -1.76657 |
| H  | 6.757962 | 1.059054 | -1.91114 |
| H  | 4.128582 | -5.85752 | -0.66992 |
| H  | 4.633669 | -8.02584 | -1.75368 |
| H  | 3.749376 | -8.52158 | -4.02654 |
| H  | 2.357954 | -6.82543 | -5.20274 |
| H  | 1.862919 | -4.65554 | -4.11607 |
| C  | -3.07494 | 0.921759 | -0.98535 |
| H  | -3.18326 | -0.00067 | -1.55366 |
| H  | -2.82651 | 1.71489  | -1.6977  |
| C  | -4.38698 | 1.240026 | -0.25402 |
| H  | -5.1828  | 1.183041 | -1.00851 |
| H  | -4.59538 | 0.450065 | 0.472696 |
| C  | -4.45591 | 2.605374 | 0.442565 |
| H  | -3.61105 | 2.722911 | 1.133141 |
| H  | -4.37261 | 3.411298 | -0.30143 |
| C  | -5.75986 | 2.735681 | 1.24736  |
| H  | -6.61446 | 2.526432 | 0.593273 |
| H  | -5.77395 | 1.964928 | 2.027597 |
| C  | -5.90013 | 4.138407 | 1.83335  |
| H  | -4.94874 | 4.500696 | 2.232829 |
| N  | -6.89632 | 4.27747  | 2.991252 |
| C  | -6.3049  | 3.734598 | 4.271187 |
| H  | -5.36163 | 4.248607 | 4.461198 |
| H  | -7.00921 | 3.940018 | 5.078937 |
| H  | -6.16729 | 2.652412 | 4.1799   |
| C  | -8.18456 | 3.545346 | 2.700763 |
| H  | -8.54304 | 3.84494  | 1.714915 |
| H  | -7.99914 | 2.469087 | 2.753223 |
| H  | -8.91149 | 3.829239 | 3.463091 |
| C  | -7.18679 | 5.742208 | 3.173604 |
| H  | -6.24539 | 6.274583 | 3.317639 |
| H  | -7.69546 | 6.116686 | 2.284522 |
| H  | -7.82397 | 5.869322 | 4.049217 |
| Br | -6.74879 | 0.134545 | 3.727439 |
| H  | 0.600944 | -0.72769 | 1.418602 |
| Zn | 1.898023 | -0.60198 | -0.7187  |
| Cl | 1.338104 | 0.639694 | -2.61453 |
| H  | -6.2341  | 4.845193 | 1.068711 |

Reference

1. Parr, R. G.; Szentpály, L. v.; Liu, S., Electrophilicity Index. *J. Am. Chem. Soc.* **1999**, *121* (9), 1922-1924.
2. Parr, R. G.; Pearson, R. G., Absolute hardness: companion parameter to absolute electronegativity. *J. Am. Chem. Soc.* **1983**, *105* (26), 7512-7516.
3. Mulliken, R. S., A New Electroaffinity Scale; Together with Data on Valence States and on Valence Ionization Potentials and Electron Affinities. *J. Chem. Phys.* **1934**, *2* (11), 782-793.
4. Fukui, K.; Yonezawa, T.; Shingu, H., A Molecular Orbital Theory of Reactivity in Aromatic Hydrocarbons. *J. Chem. Phys.* **1952**, *20* (4), 722-725.
5. Parr, R. G.; Yang, W., Density functional approach to the frontier-electron theory of chemical reactivity. *J. Am. Chem. Soc.* **1984**, *106* (14), 4049-4050.
6. Koopmans, T., Über die Zuordnung von Wellenfunktionen und Eigenwerten zu den Einzelnen Elektronen Eines Atoms. *Physica* **1934**, *1* (1), 104-113.
7. Fuentealba, P.; Chamorro, E.; Cárdenas, C., Further exploration of the Fukui function, hardness, and other reactivity indices and its relationships within the Kohn–Sham scheme. *Int. J. Quantum Chem* **2007**, *107* (1), 37-45.
1. Parr, R. G.; Szentpály, L. v.; Liu, S., Electrophilicity Index. *J. Am. Chem. Soc.* **1999**, *121* (9), 1922-1924.
2. Parr, R. G.; Pearson, R. G., Absolute hardness: companion parameter to absolute electronegativity. *J. Am. Chem. Soc.* **1983**, *105* (26), 7512-7516.
3. Mulliken, R. S., A New Electroaffinity Scale; Together with Data on Valence States and on Valence Ionization Potentials and Electron Affinities. *J. Chem. Phys.* **1934**, *2* (11), 782-793.
